# Supplementary material for: Pnictogen bonding at the service of gold catalysis: the case of a phosphinostiborane gold complex
Source: Royal Society of Chemistry journal article supplement (doi:10.1039/d3cc04942f), 2023-11-16
Supplement: d3cc04942f1.pdf [file d3cc04942f1.pdf]

# **Pnictogen bonding at the service of gold catalysis: The case of a phosphinostiborane gold complex**

## **Supporting Information**

Benyu Zhou, Shantabh Bedajna, and François P. Gabbaï\*

*Texas A&M University, Department of Chemistry, College Station, Texas 77843, United States*

# Contents

|     |                                                                                                                         |     |
|-----|-------------------------------------------------------------------------------------------------------------------------|-----|
| 1   | Techniques and methods .....                                                                                            | S1  |
| 1.1 | NMR spectroscopy .....                                                                                                  | S1  |
| 1.2 | Single crystal X-ray diffraction measurement .....                                                                      | S1  |
| 1.3 | Quantum chemical computations.....                                                                                      | S1  |
| 2   | Experimental Procedures .....                                                                                           | S2  |
| 2.1 | Syntheses and NMR spectra .....                                                                                         | S2  |
| 3   | Catalytic isomerization of propargylic amides.....                                                                      | S18 |
| 4   | Computational results .....                                                                                             | S21 |
| 4.1 | Cartesian Coordinates for the optimized structure of <b>3</b> -AuCl in gas phase .....                                  | S21 |
| 4.2 | Cartesian Coordinates for the optimized structure of <b>6</b> in gas phase.....                                         | S22 |
| 4.3 | Cartesian Coordinates for the optimized structure of the adduct between <b>3</b> -AuCl and <b>6</b> in gas phase<br>S23 |     |
| 4.4 | Thermodynamic parameters of the optimized structures. All energies are in Hartree. ....                                 | S25 |
|     | References.....                                                                                                         | S26 |

## 1 Techniques and methods

All the air and moisture-sensitive experiments were carried out under a dry nitrogen atmosphere using either the glove box or standard Schlenk techniques. 4,5-Dibromo-2,7-*tert*-butyl-9,9-dimethylxanthene<sup>1</sup> and 4-AuCl<sup>2</sup> were synthesized following literature procedures. All other chemicals were obtained from commercial suppliers and used without further purification. Solvents were dried by refluxing over Na/K (Et<sub>2</sub>O, THF), or CaH<sub>2</sub> (CH<sub>2</sub>Cl<sub>2</sub>, CDCl<sub>3</sub>). All other solvents were ACS reagent grade and used as received. Elemental analyses were performed by Atlantic Microlab (Norcross, GA).

### 1.1 NMR spectroscopy

NMR spectra were recorded at room temperature using a Varian Inova 500 FT NMR spectrometer, a Bruker Avance 500 NMR spectrometer, or a Bruker Ascend 400 NMR spectrometer. Chemical shifts are given in ppm. <sup>1</sup>H and <sup>13</sup>C signals were referenced to residual solvent signals.<sup>3</sup>

The following abbreviations are used in the compilation of NMR data provided for each compound:

s, singlet; d, doublet; t, triplet; q, quartet; m, multiplet; dd, doublet of doublets; td, triplet of doublets; tt, triplet of triplets; dm, doublet of multiplets.

<sup>m</sup>J<sub>X-Y</sub>, coupling constant between nucleus X and Y separated by m bonds.

### 1.2 Single crystal X-ray diffraction measurement

The crystallographic measurements were performed at 110 K using a Bruker D8 Quest (Mo source) or a Bruker APEX 22 diffractometer equipped with Photon III detectors. Semi-empirical absorption corrections were applied using the Bruker SADABS software package.<sup>4</sup> The structures were solved by direct methods with SHELXT<sup>5</sup> to locate all non-hydrogen atoms. Subsequent refinement using a difference map on F<sup>2</sup> with the SHELXL package<sup>6</sup> allowed for the location of the remaining non-hydrogen atoms which were refined anisotropically. H atoms were added in calculated positions using a riding model. CCDC 2299051-2299054 contain the supplementary crystallographic data for this paper. These data can be obtained free of charge via [www.ccdc.cam.ac.uk/data\\_request/cif](http://www.ccdc.cam.ac.uk/data_request/cif), or by emailing [data\\_request@ccdc.cam.ac.uk](mailto:data_request@ccdc.cam.ac.uk).

### 1.3 Quantum chemical computations

All calculations were conducted with the ORCA 5.0.2 program.<sup>7</sup> Gas-phase optimizations and frequency calculations were performed using r<sup>2</sup>SCAN-3c composite method<sup>8</sup> and mixed basis sets: def2-SVP<sup>9</sup> for C, H, O, F, Cl and def2-TZVP<sup>9-11</sup> for Sb and Au. Frequency calculations were carried out to verify the nature of the local minima with no imaginary frequency being found except for the adduct of 3-AuCl and 6. In this case, a small negative frequency of -2.14 cm<sup>-1</sup> remained and was ignored because of its low value. Single point calculations on the optimized structure were performed with PWPB95-D3(BJ) method<sup>12</sup> and def2-QZVPP basis set.<sup>9, 10, 13, 14</sup> Electrostatic potential (ESP) maps were plotted using Multiwfn software package<sup>15, 16</sup> and VMD software.<sup>17, 18</sup>

## 2 Experimental Procedures

### 2.1 Syntheses and NMR spectra

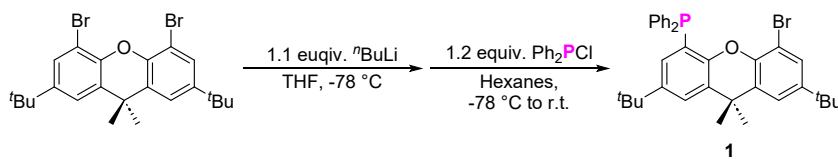

**4-diphenylphosphino-5-bromo-2,7-di-*tert*-butyl-9,9-dimethylxanthene (1)**: The synthesis was adapted from a known literature procedure.<sup>19</sup> Under a  $\text{N}_2$  atmosphere, a solution of  $n\text{BuLi}$  (2.5 M in hexanes, 3.3 mL, 8.25 mmol) was added dropwise to a solution of 4,5-dibromo-2,7-di-*tert*-butyl-9,9-dimethylxanthene (3.60 g, 7.50 mmol) in anhydrous THF (80 mL) cooled at  $-78\text{ }^\circ\text{C}$ . The resulting mixture was stirred at  $-78\text{ }^\circ\text{C}$  for 2 h. To this mixture was added dropwise a solution of  $\text{Ph}_2\text{P-Cl}$  (1.67 mL, 1.99 g, 9.00 mmol) in anhydrous hexanes (10 mL). The afforded mixture was slowly warmed up to room temperature and kept at room temperature overnight. The resulting suspension was quenched with  $\text{H}_2\text{O}$  (100 mL). The resulting mixture was extracted with  $\text{CH}_2\text{Cl}_2$  (100 mL  $\times$  3). The organic fractions were combined, dried over anhydrous  $\text{MgSO}_4$ , filtered, and brought to dryness under reduced pressure to afford a light yellow oil as the crude product. This oil was triturated with a mixture of  $\text{CH}_2\text{Cl}_2/\text{MeOH}$  (5 mL/25 mL), affording **1** as a colorless powder (2.34g). This crude product was used in the next step without further purification.

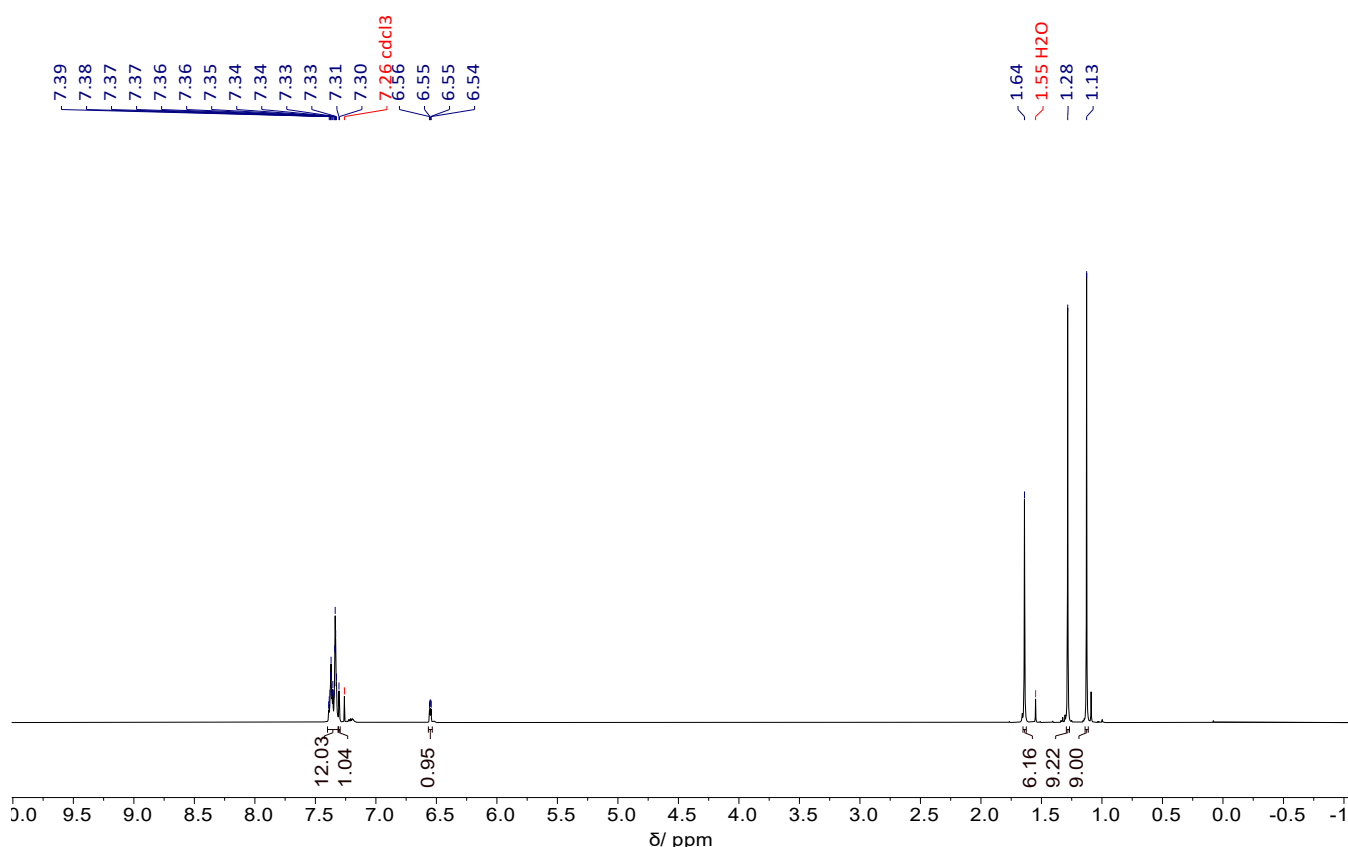

$^1\text{H NMR}$  ( $\text{CDCl}_3$ , 500.1 MHz):  $\delta$  7.39-7.31 (m, 12H, Xan-*H* & Ph-*H*), 7.30 (d,  $^4J_{\text{H-H}} = 2.2\text{ Hz}$ , 1H, Xan-*H*), 6.55 (dd,  $^3J_{\text{P-H}} = 4.8\text{ Hz}$ ,  $^4J_{\text{H-H}} = 2.2\text{ Hz}$ , 2H, Xan-3-*H*), 1.64 (s, 6H,  $\text{C}(\text{CH}_3)_2$ ), 1.28 (s, 9H,  $\text{C}(\text{CH}_3)_3$ ), 1.13 (s, 9H,  $\text{C}(\text{CH}_3)_3$ ).

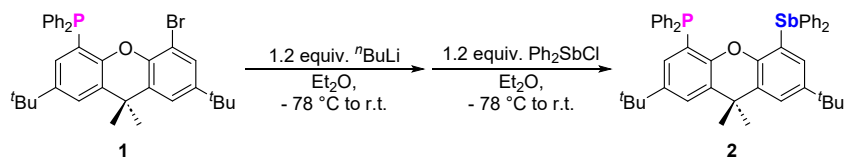

**4-diphenylphosphino-5-diphenylstibino-2,7-di-tert-butyl-9,9-dimethylxanthene (2):** Under a  $N_2$  atmosphere, a solution of  $n\text{BuLi}$  (2.5 M in hexanes, 1.9 mL, 4.75 mmol) was added dropwise to a solution of **1** in anhydrous  $\text{Et}_2\text{O}$  (50 mL) cooled at  $-78^\circ\text{C}$ . The resulting light yellow solution was stirred at  $-78^\circ\text{C}$  for 30 min, and then warmed up to room temperature and kept at room temperature for 1h. The resulting solution was cooled to  $-78^\circ\text{C}$  and treated with  $\text{Ph}_2\text{SbCl}$  (1.50 g, 4.82 mmol) suspended in anhydrous  $\text{Et}_2\text{O}$  (10 mL). The resulting white suspension was slowly warmed to room temperature and kept at room temperature overnight. The reaction mixture was brought to dryness under reduced pressure. The residue was extracted with  $\text{CH}_2\text{Cl}_2$  (100 mL) and filtered through a pad of celite. The filtrate was brought to dryness under reduced pressure to afford a sticky colorless solid as the crude product. The crude solid was triturated with pentane (20 mL), affording compound **2** as a colorless powder (2.12 g, 69%). Single crystals suitable for X-ray diffraction were grown by slow evaporation of a  $\text{CH}_2\text{Cl}_2$  solution of **2**.

## Atlantic Microlab, Inc.

Sample No. 2

180 Atlantic Blvd. Suite M  
Norcross, GA 30071  
www.atlanticmicrolab.com

Company/School Texas A&M University

Dept. Chemistry

Address 580 Ross Street

City, State, Zip College Station, TX 77843

Professor/Supervisor: Francois Gabbai

Name Benyu Zhou

Date 10/04/2023

PO# / CC# AB0856762

Phone (281) 935-6107

| Element | Theory | Found |  | Single <input checked="" type="checkbox"/>                                                                                                                                            | Duplicate <input type="checkbox"/> |
|---------|--------|-------|--|---------------------------------------------------------------------------------------------------------------------------------------------------------------------------------------|------------------------------------|
| C       | 72.22  | 72.31 |  | Elements Present: C H O P Sb                                                                                                                                                          |                                    |
| H       | 6.18   | 6.27  |  | Analyze for: C H                                                                                                                                                                      |                                    |
|         |        |       |  | Hygroscopic <input type="checkbox"/> Explosive <input type="checkbox"/>                                                                                                               |                                    |
|         |        |       |  | M.P. _____ B.P. _____                                                                                                                                                                 |                                    |
|         |        |       |  | To be dried: Yes <input checked="" type="checkbox"/> No <input type="checkbox"/>                                                                                                      |                                    |
|         |        |       |  | Temp. _____ Vac. _____ Time _____                                                                                                                                                     |                                    |
|         |        |       |  | Rush Service <input type="checkbox"/> <small>Rush service guarantees analyses will be completed and results available by 5 PM EST on the day the sample is received by 11 AM.</small> |                                    |
|         |        |       |  | Include Email Address or FAX # Below                                                                                                                                                  |                                    |
|         |        |       |  | benyuzhou1995@tamu.edu                                                                                                                                                                |                                    |

Date Received OCT 16 2023

Date Completed OCT 17 2023

Remarks:

**Elemental Analysis:** Calculated for  $\text{C}_{47}\text{H}_{48}\text{OPSb}$ : C 72.22, H, 6.19; Found: C 72.31, H 6.27

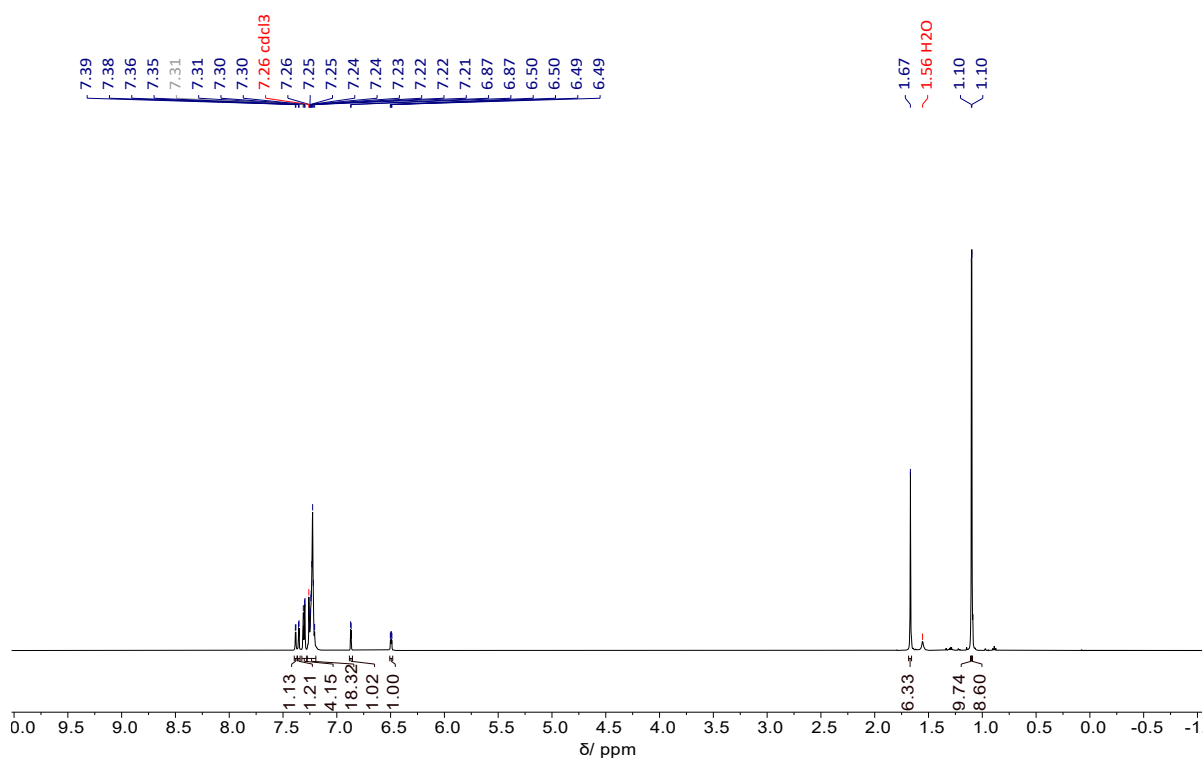

**$^1\text{H}$  NMR** ( $\text{CDCl}_3$ , 500.1 MHz):  $\delta$  7.38 (d,  $^4J_{\text{H-H}} = 2.4$  Hz, 1H, Xan-*H*), 7.35 (d,  $^4J_{\text{H-H}} = 2.4$  Hz, 1H, Xan-*H*), 7.32-7.28 (m, 4H, Ph-*H*), 7.27-7.20 (partially overlapping with the  $\text{CHCl}_3$  solvent peak, m, 16H, Ph-*H*), 6.87 (d,  $^4J_{\text{H-H}} = 2.2$  Hz, 1H, Xan-1-*H*), 6.49 (dd,  $^3J_{\text{P-H}} = 4.8$  Hz,  $^4J_{\text{H-H}} = 2.2$  Hz, 1H, Xan-3-*H*), 1.67 (s, 6H,  $\text{C}(\text{CH}_3)_2$ ), 1.10 (s, 9H,  $\text{C}(\text{CH}_3)_3$ ), 1.10 (s, 9H,  $\text{C}(\text{CH}_3)_3$ ).

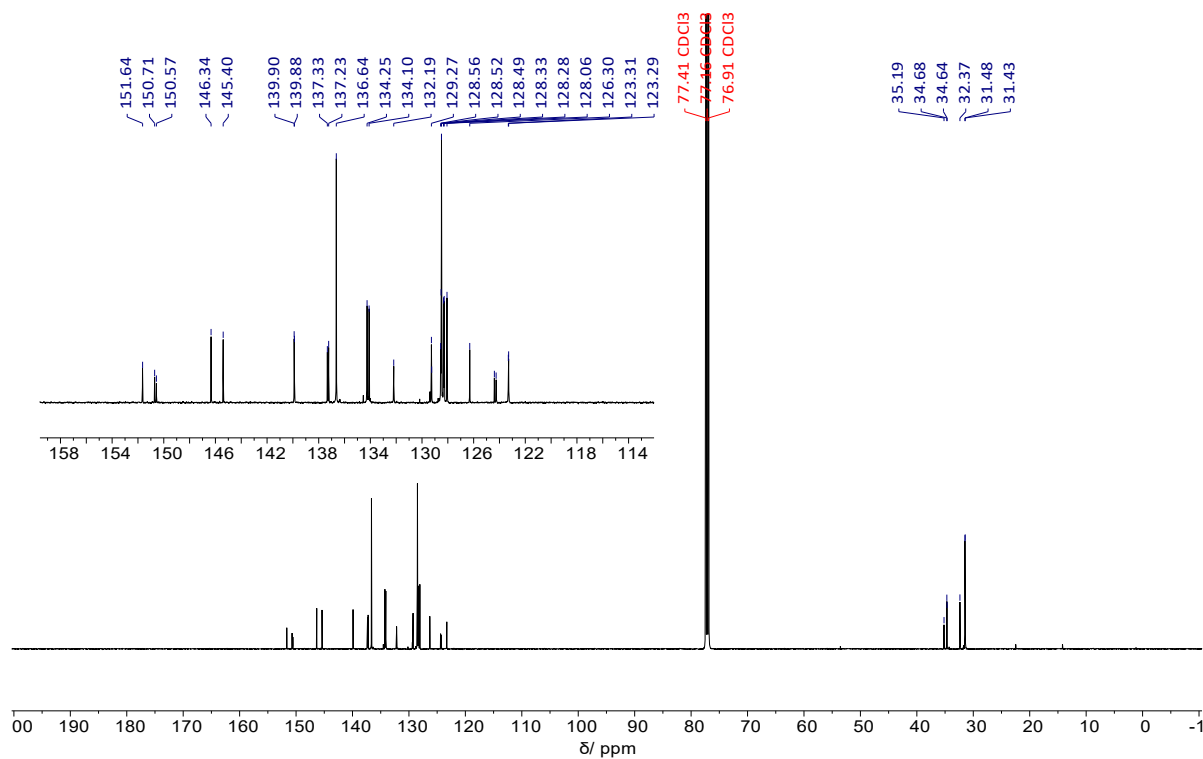

**$^{13}\text{C}\{^1\text{H}\}$  NMR** ( $\text{CDCl}_3$ , 125.8 MHz):  $\delta$  151.6 (s), 150.7 (s), 150.6 (s), 146.3 (s), 145.4 (s), 139.9 (s), 139.9 (s), 137.3 (s), 137.2 (s), 136.6 (s), 134.2 (s), 134.1 (s), 132.2 (s), 129.3 (s), 128.5 (s), 128.5 (s), 128.3 (s), 128.3 (s), 128.28 (s), 128.1 (s), 126.3 (s), 123.3 (s), 123.2 (s), 35.2 (s), 34.7 (s), 34.6 (s), 32.4 (s), 31.5 (s), 31.4 (s).

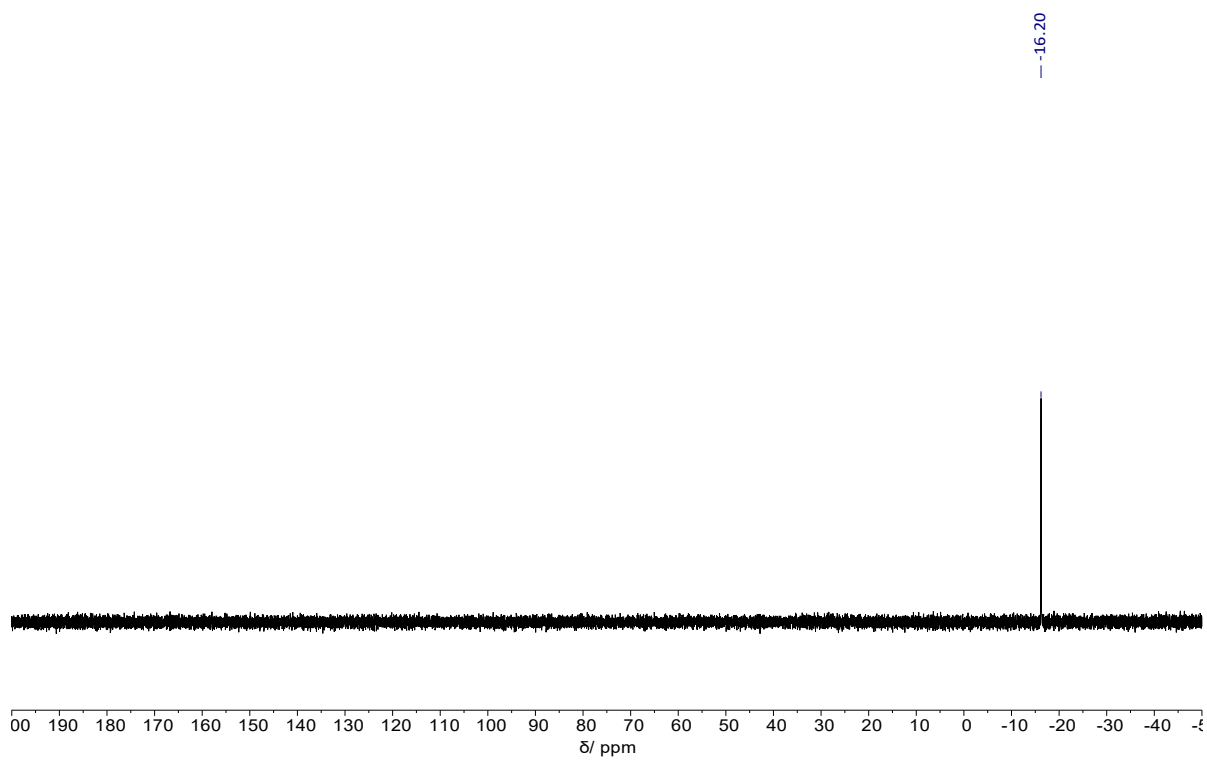

$^{31}\text{P}\{^1\text{H}\}$  NMR ( $\text{CDCl}_3$ , 202.1 MHz):  $\delta$  -16.20 (s).

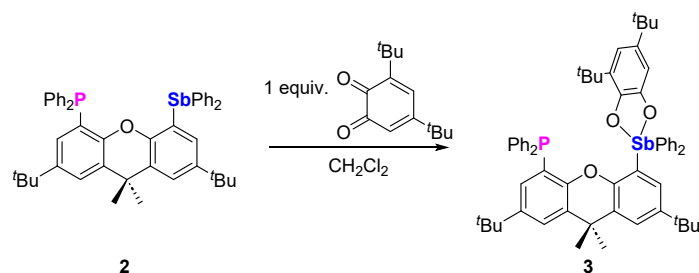

**Compound 3:** A solution of 3,5-di-tert-butyl-o-benzoquinone (56.4 mg, 0.256 mmol) in  $\text{CH}_2\text{Cl}_2$  (5 mL) was added dropwise to a stirred solution of **2** (200 mg, 0.256 mmol) in  $\text{CH}_2\text{Cl}_2$  (5 mL). The resulting yellow solution was stirred for 30 min. The reaction solution was brought to dryness under reduced pressure. The residue was triturated with pentane (10 mL) to afford compound **3** as a yellow powder (213 mg, 83%). Single crystals suitable for X-ray diffraction were grown by slow evaporation of a  $\text{CHCl}_3/\text{MeOH}$  solution of **3**.

## Atlantic Microlab, Inc.

Sample No. 3

6180 Atlantic Blvd. Suite M  
Norcross, GA 30071  
www.atlanticmicrolab.com

Company/School Texas A&M University

Dept. Chemistry

Address 580 Ross Street

City, State, Zip College Station, TX 77843

Professor/Supervisor: Francois Gabbai

Name Benyu Zhou

Date 10/04/2023

PO# / CC# AB0854505

Phone (281) 935-6107

| Element | Theory | Found |  | Single <input checked="" type="checkbox"/> Duplicate <input type="checkbox"/>                                                                                                         |  |
|---------|--------|-------|--|---------------------------------------------------------------------------------------------------------------------------------------------------------------------------------------|--|
|         |        |       |  |                                                                                                                                                                                       |  |
| C       | 73.11  | 72.86 |  | Elements Present: C H O P Sb                                                                                                                                                          |  |
| H       | 6.84   | 6.92  |  | Analyze for: C H                                                                                                                                                                      |  |
|         |        |       |  | Hygroscopic <input type="checkbox"/> Explosive <input type="checkbox"/>                                                                                                               |  |
|         |        |       |  | M.P. _____ B.P. _____                                                                                                                                                                 |  |
|         |        |       |  | To be dried: Yes <input checked="" type="checkbox"/> No <input type="checkbox"/>                                                                                                      |  |
|         |        |       |  | Temp. _____ Vac. _____ Time _____                                                                                                                                                     |  |
|         |        |       |  | Rush Service <input type="checkbox"/> <small>Rush service guarantees analyses will be completed and results available by 5 PM EST on the day the sample is received by 11 AM.</small> |  |
|         |        |       |  | Include Email Address or FAX # Below                                                                                                                                                  |  |
|         |        |       |  | benyuzhou1995@tamu.edu                                                                                                                                                                |  |

Date Received OCT 09 2023

Date Completed OCT 10 2023

Remarks:

**Elemental Analysis:** Calculated for  $\text{C}_{61}\text{H}_{68}\text{O}_3\text{PSb}$ : C 73.12, H, 6.84; Found: C 72.86, H 6.92



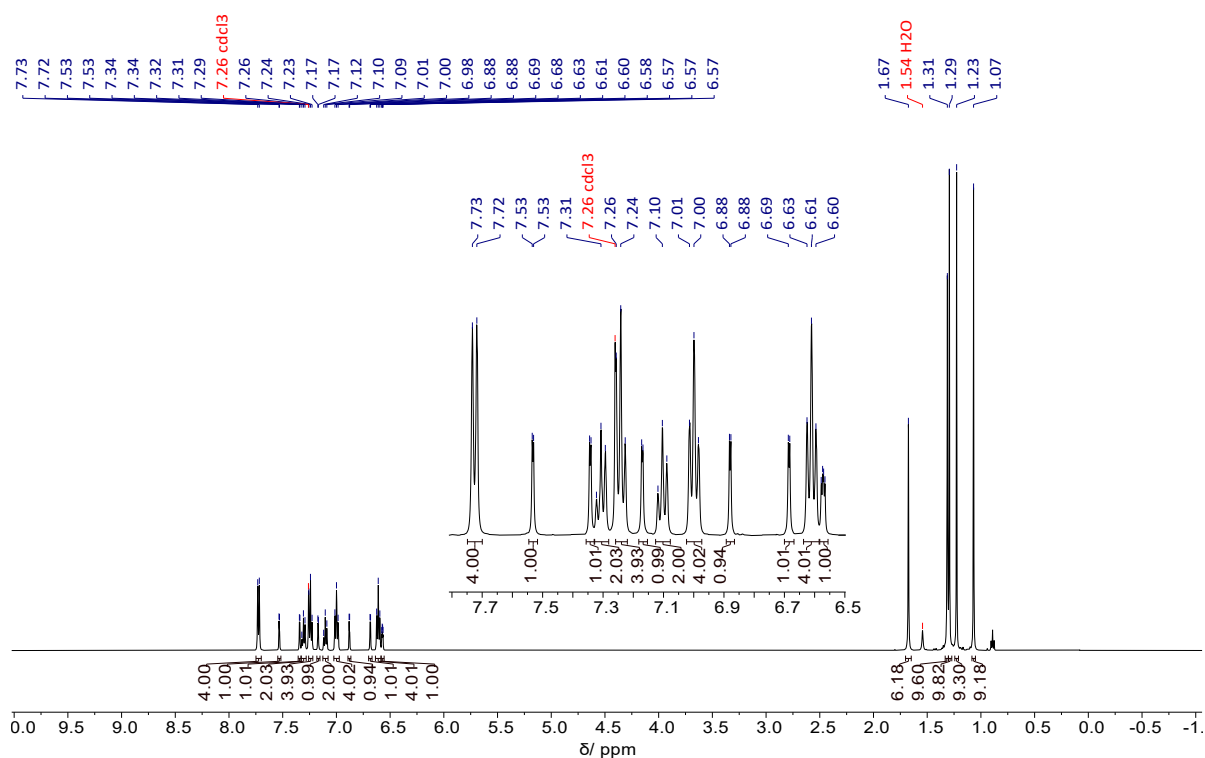

$^1\text{H NMR}$  ( $\text{CDCl}_3$ , 500.1 MHz):  $\delta$  7.72 (d,  $^3J_{\text{H-H}} = 7.3$  Hz, 4H, Ph-*H*), 7.53 (d,  $^4J_{\text{H-H}} = 2.3$  Hz, 1H, Xanthene-*H* or Catecholate-*H*), 7.34 (d,  $^4J_{\text{H-H}} = 2.3$  Hz, 1H, Xanthene-*H* or Catecholate-*H*), 7.31 (t,  $^3J_{\text{H-H}} = 7.4$  Hz, 2H, Ph-4-*H*), 7.24 (t,  $^3J_{\text{H-H}} = 7.4$  Hz, 4H, Ph-3,5-*H*), 7.17 (d,  $^4J_{\text{H-H}} = 2.2$  Hz, 1H, Xanthene-*H*), 7.10 (t,  $^3J_{\text{H-H}} = 7.3$  Hz, 2H, Ph-4-*H*), 7.00 (t,  $^3J_{\text{H-H}} = 7.4$  Hz, 4H, Ph-3,5-*H*), 6.88 (d,  $^4J_{\text{H-H}} = 2.4$  Hz, 1H, Xanthene-*H*), 6.68 (d,  $^4J_{\text{H-H}} = 2.4$  Hz, 1H, Xanthene-*H*), 6.61 (t,  $^3J_{\text{H-H}} = 7.4$  Hz, 4H, Ph-3,5-*H*), 6.57 (dd,  $^4J_{\text{P-H}} = 4.0$  Hz,  $^4J_{\text{H-H}} = 2.3$  Hz, 4H, Ph-3,5-*H*), 1.67 (s, 6H,  $\text{C}(\text{CH}_3)_2$ ), 1.31 (s, 9H,  $\text{C}(\text{CH}_3)_3$ ), 1.29 (s, 9H,  $\text{C}(\text{CH}_3)_3$ ), 1.23 (s, 9H,  $\text{C}(\text{CH}_3)_3$ ), 1.07 (s, 9H,  $\text{C}(\text{CH}_3)_3$ ).

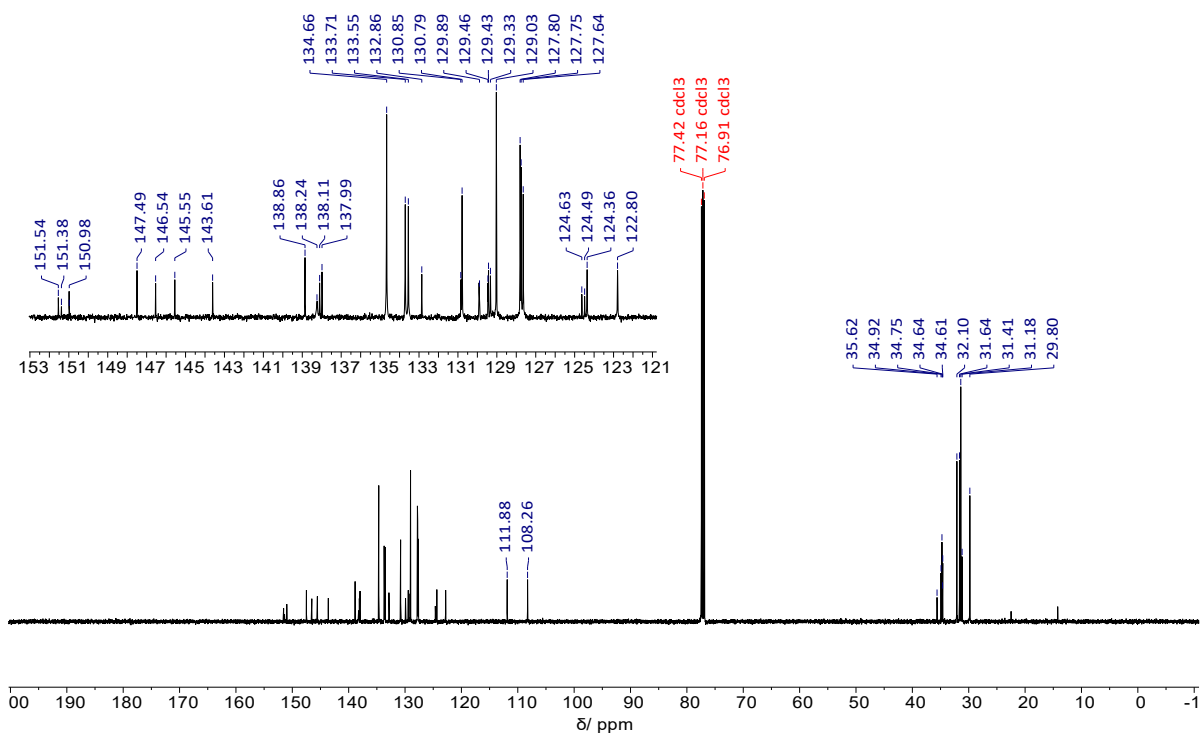

$^{13}\text{C}\{^1\text{H}\}$  NMR ( $\text{CDCl}_3$ , 125.8 MHz):  $\delta$  151.5 (s), 151.4 (s), 151.0 (s), 147.5 (s), 146.5 (s), 145.6 (s), 143.6 (s), 138.9 (s), 138.2 (s), 138.1 (s), 138.0 (s), 134.7 (s), 133.7 (s), 133.6 (s), 132.9 (s), 130.9 (s), 130.8 (s), 129.9 (s), 129.5 (s), 129.4 (s), 127.8 (s), 127.8 (s), 127.6 (s), 124.6 (s), 124.5 (s), 124.4 (s), 122.8 (s), 111.9 (s), 108.3 (s), 35.6 (s), 34.9 (s), 34.8 (s), 34.7 (s), 32.6 (s), 32.1 (s), 31.6 (s), 31.4 (s), 31.2 (s), 29.8 (s).

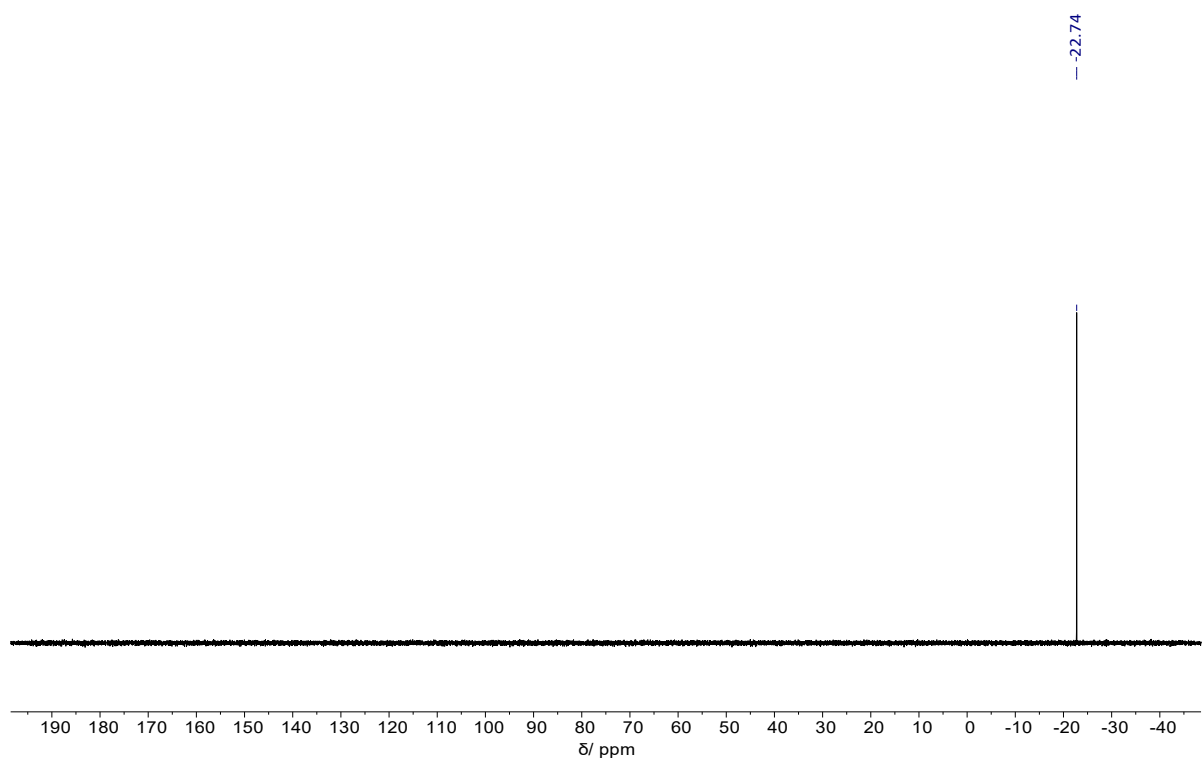

$^{31}\text{P}\{^1\text{H}\}$  NMR ( $\text{CDCl}_3$ , 202.4 MHz):  $\delta$  -22.74 (s)

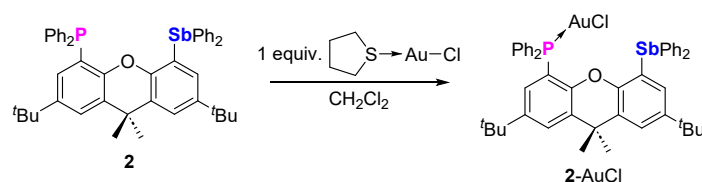

**Compound 2-AuCl:** Compound 2 (400 mg, 0.512 mmol) and chloro(tetrahydrothiophene)gold (I) (164 mg, 0.512 mmol) were combined in  $\text{CH}_2\text{Cl}_2$  (10 mL). The resulting solution was stirred in the absence of light for 30 min, and then filtered through a celite plug. The colorless filtrate was brought to dryness to afford a colorless solid as the crude product. This solid was redissolved in  $\text{CHCl}_3$  (5 mL) and precipitated with MeOH (20 mL) to obtain a colorless solid. This solid was further washed with  $\text{Et}_2\text{O}$  to afford compound 2-AuCl as a colorless powder (391 mg, 75%). Single crystals suitable for X-ray diffraction were grown by slow vapor diffusion of  $\text{Et}_2\text{O}$  into a  $\text{CHCl}_3$  solution of 2-AuCl.

## Atlantic Microlab, Inc.

Sample No. 2-AuCl

180 Atlantic Blvd. Suite M  
Norcross, GA 30071  
www.atlanticmicrolab.com

Company/School Texas A&M University  
Dept. Chemistry  
Address 580 Ross Street  
City, State, Zip College Station, TX 77843

Professor/Supervisor: Francois Gabbai Name Benyu Zhou Date 10/04/2023  
PO# / CC# AB0856762 Phone (281) 935-6107

| Element | Theory | Found |  | Single <input checked="" type="checkbox"/>                                                                                                                                            | Duplicate <input type="checkbox"/> |
|---------|--------|-------|--|---------------------------------------------------------------------------------------------------------------------------------------------------------------------------------------|------------------------------------|
| C       | 55.67  | 55.93 |  | Elements Present: C H O P Cl Sb Zu                                                                                                                                                    |                                    |
| H       | 4.77   | 4.87  |  | Analyze for: C H                                                                                                                                                                      |                                    |
|         |        |       |  | Hygroscopic <input type="checkbox"/> Explosive <input type="checkbox"/><br>M.P. _____ B.P. _____                                                                                      |                                    |
|         |        |       |  | To be dried: Yes <input checked="" type="checkbox"/> No <input type="checkbox"/><br>Temp. _____ Vac. _____ Time _____                                                                 |                                    |
|         |        |       |  | Rush Service <input type="checkbox"/> <small>Rush service guarantees analyses will be completed and results available by 5 PM EST on the day the sample is received by 11 AM.</small> |                                    |
|         |        |       |  | Include Email Address or FAX # Below<br><p style="text-align: center;">benyuzhou1995@tamu.edu</p>                                                                                     |                                    |

Date Received OCT 16 2023 Date Completed OCT 17 2023  
Remarks:

**Elemental Analysis:** Calculated for  $\text{C}_{47}\text{H}_{48}\text{OPClSbAu}$ : C 55.67, H, 4.77; Found: C 55.93, H 4.87.

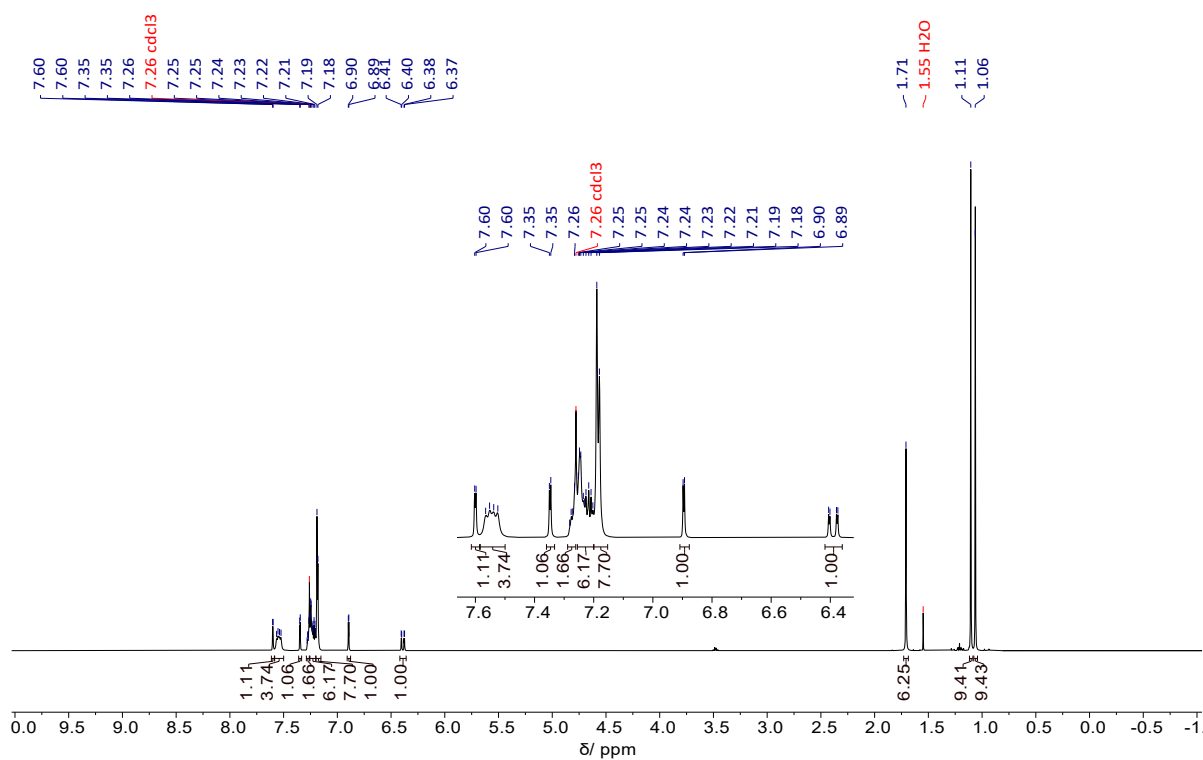

$^1\text{H NMR}$  ( $\text{CDCl}_3$ , 500.1 MHz):  $\delta$  7.60 (d,  $^4J_{\text{H-H}} = 2.3$  Hz, 1H, Xan-*H*), 7.58-7.50 (m, 4H, Ph-*H*), 7.35 (d,  $^4J_{\text{H-H}} = 2.3$  Hz, 1H, Xan-*H*), 7.29-7.20 (m, 8H, Ph-*H*), 7.20-7.16 (m, 8H, Ph-*H*), 6.90 (d,  $^4J_{\text{H-H}} = 2.4$  Hz, 1H, Xan-1-*H*), 6.39 (dd,  $^3J_{\text{H-H}} = 13.3$  Hz,  $^4J_{\text{H-H}} = 2.4$  Hz, 1H, Xan-3-*H*), 1.71 (s, 6H,  $\text{C}(\text{CH}_3)_2$ ), 1.11 (s, 9H,  $\text{C}(\text{CH}_3)_3$ ), 1.06 (s, 9H,  $\text{C}(\text{CH}_3)_3$ ).

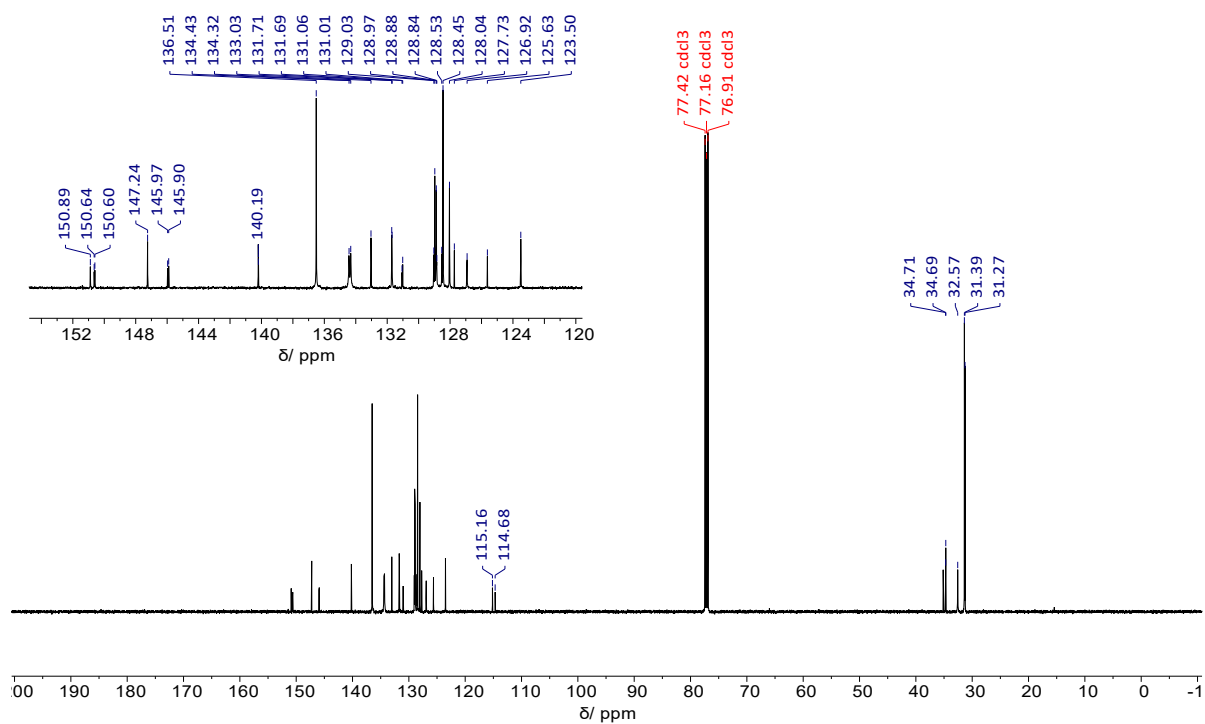

$^{13}\text{C}\{^1\text{H}\}$  NMR ( $\text{CDCl}_3$ , 125.8 MHz):  $\delta$  150.9 (s), 150.64 (s), 150.60 (s), 147.2 (s), 146.0 (s), 145.9 (s), 140.2 (s), 136.5 (s), 134.4 (s), 134.3 (s), 133.0 (s), 131.7 (s), 131.7 (s), 131.1 (s), 131.0 (s), 129.0 (s), 129.0 (s), 128.9 (s), 128.8 (s), 128.5 (s), 128.4 (s), 128.0 (s), 127.7 (s), 126.9 (s), 125.6 (s), 123.5 (s), 34.7 (s), 34.7 (s), 32.6 (s), 31.4 (s), 31.3 (s).

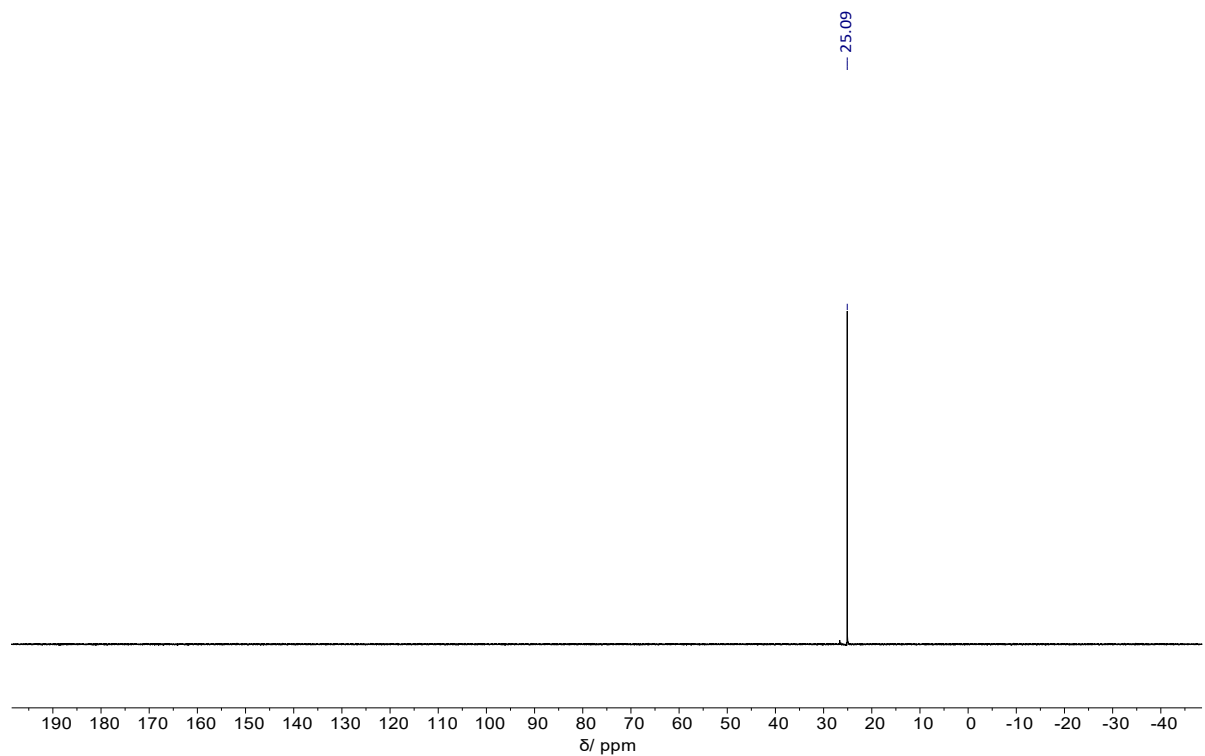

$^{31}\text{P}\{^1\text{H}\}$  NMR ( $\text{CDCl}_3$ , 202.4 MHz):  $\delta$  25.09 (s)

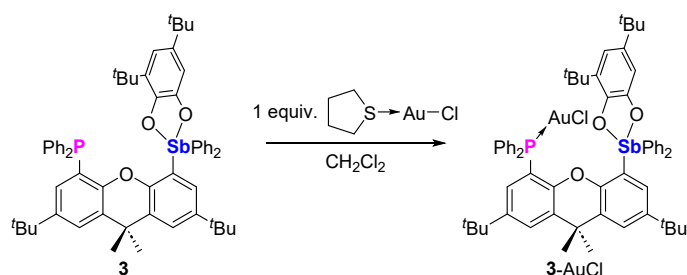

**Compound 3-AuCl:** Compound **3** (50 mg, 0.0500 mmol) and chloro(tetrahydrothiophene)gold (I) (16.0 mg, 0.0500 mmol) were combined in CH<sub>2</sub>Cl<sub>2</sub> (5 mL). The resulting solution was stirred in the absence of light for 5 min, and then the solution was brought to dryness to afford a yellow solid as crude product. This solid was washed with Pentane (10 mL) to afford compound **3-AuCl** as a yellow powder (59.1 mg, 96%). Single crystals suitable for X-ray diffraction were grown by slow vapor diffusion of Et<sub>2</sub>O into a CHCl<sub>3</sub> solution of **3-AuCl**.

## Atlantic Microlab, Inc.

Sample No. 3-AuCl

6180 Atlantic Blvd. Suite M  
Norcross, GA 30071  
www.atlanticmicrolab.com

Company/School Texas A&M University

Dept. Chemistry

Address 580 Ross Street

City, State, Zip College Station, TX 77843

Professor/Supervisor: Francois Gabbai

Name Benyu Zhou

Date 10/04/2023

PO# / CC# AB0854505

Phone (281) 935-6107

| Element | Theory | Found |  |
|---------|--------|-------|--|
| C       | 59.36  | 59.35 |  |
| H       | 5.55   | 5.51  |  |
|         |        |       |  |
|         |        |       |  |
|         |        |       |  |
|         |        |       |  |
|         |        |       |  |

|                                                                                  |                                                                                                                                                 |
|----------------------------------------------------------------------------------|-------------------------------------------------------------------------------------------------------------------------------------------------|
| Single <input checked="" type="checkbox"/>                                       | Duplicate <input type="checkbox"/>                                                                                                              |
| Elements Present: C H O P Cl Sb Zu                                               |                                                                                                                                                 |
| Analyze for: C H                                                                 |                                                                                                                                                 |
| Hygroscopic <input type="checkbox"/>                                             | Explosive <input type="checkbox"/>                                                                                                              |
| M.P. _____                                                                       | B.P. _____                                                                                                                                      |
| To be dried: Yes <input checked="" type="checkbox"/> No <input type="checkbox"/> |                                                                                                                                                 |
| Temp. _____                                                                      | Vac. _____ Time _____                                                                                                                           |
| Rush Service <input type="checkbox"/>                                            | <small>Rush service guarantees analyses will be completed and results available by 5 PM EST on the day the sample is received by 11 AM.</small> |
| Include Email Address or FAX # Below                                             |                                                                                                                                                 |
| benyuzhou1995@tamu.edu                                                           |                                                                                                                                                 |

Date Received OCT 09 2023

Date Completed OCT 10 2023

Remarks:

**Elemental Analysis:** Calculated for C<sub>61</sub>H<sub>68</sub>O<sub>3</sub>PClSbAu: C 59.33, H, 5.55; Found: C 59.35, H 5.51.

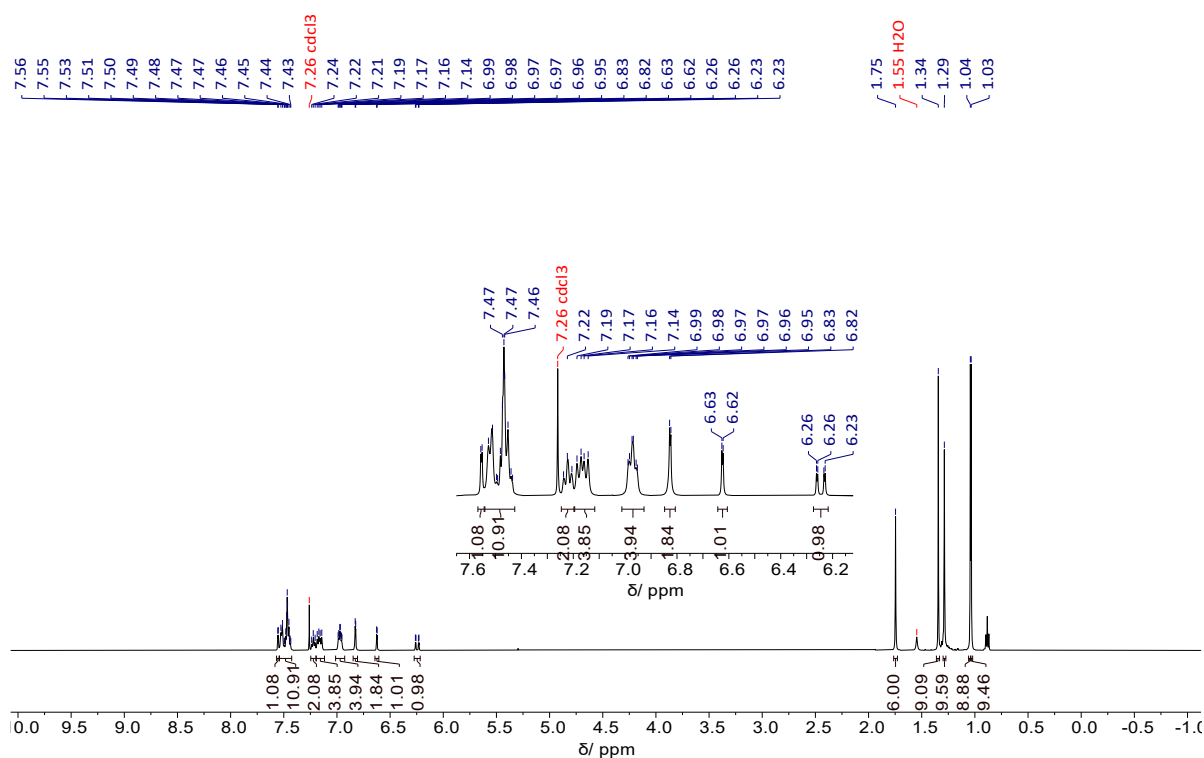

**<sup>1</sup>H NMR** (CDCl<sub>3</sub>, 500.1 MHz): δ 7.55 (d, <sup>4</sup>J<sub>H-H</sub> = 2.4 Hz, 1H, ), 7.54-7.43 (m, 11H, Ph-*H*), 7.22 (t, <sup>3</sup>J<sub>H-H</sub>=7.3 Hz, Ph-4-*H*), 7.16 (dd, <sup>3</sup>J<sub>P-H</sub>=13.7 Hz, <sup>3</sup>J<sub>H-H</sub>=7.8 Hz, 4H, PPh<sub>2</sub>-2,6-*H*), 7.00-6.94(m, 4H, Ph-*H*), 6.83(d, <sup>4</sup>J<sub>H-H</sub> = 2.4 Hz, 2H, Xanthene-*H* or Catecholate-*H*), 6.62 (d, <sup>4</sup>J<sub>H-H</sub> = 2.4 Hz, 1H, Xanthene-*H*), 6.25 (dd, <sup>3</sup>J<sub>H-H</sub> = 14.2 Hz, <sup>4</sup>J<sub>H-H</sub> = 2.4 Hz, 1H, Xanthene-4-*H*), 1.75 (s, 6H, C(CH<sub>3</sub>)<sub>2</sub>), 1.34 (s, 9H, C(CH<sub>3</sub>)<sub>3</sub>), 1.29 (s, 9H, C(CH<sub>3</sub>)<sub>3</sub>), 1.04 (s, 9H, C(CH<sub>3</sub>)<sub>3</sub>), 1.03 (s, 9H, C(CH<sub>3</sub>)<sub>3</sub>).

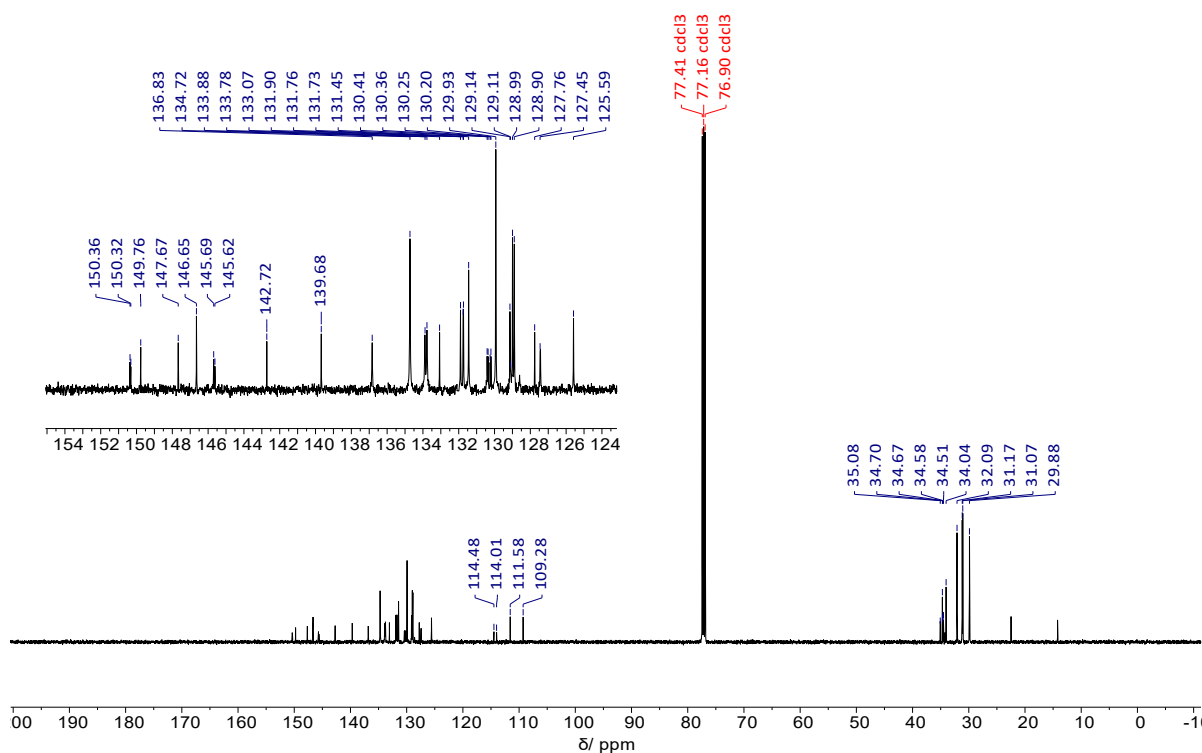

$^{13}\text{C}\{^1\text{H}\}$  NMR ( $\text{CDCl}_3$ , 125.8 MHz):  $\delta$  150.4 (s), 150.3 (s), 149.8 (s), 147.7 (s), 146.6 (s), 145.7 (s), 145.6 (s), 142.7 (s), 139.7 (s), 136.8 (s), 134.7 (s), 133.9 (s), 133.8 (s), 133.1 (s), 131.9 (s), 131.8 (s), 131.7 (s), 131.4 (s), 130.4 (s), 130.4 (s), 130.3 (s), 130.2 (s), 129.9 (s), 129.1 (s), 129.0 (s), 128.9 (s), 127.8 (s), 127.5 (s), 127.4 (s), 125.6 (s), 114.5 (s), 114.0 (s), 111.6 (s), 109.3 (s), 35.1 (s), 34.7 (s), 34.7 (s), 34.6 (s), 34.5 (s), 34.0 (s), 32.1 (s), 31.2 (s), 31.1 (s), 29.9 (s).

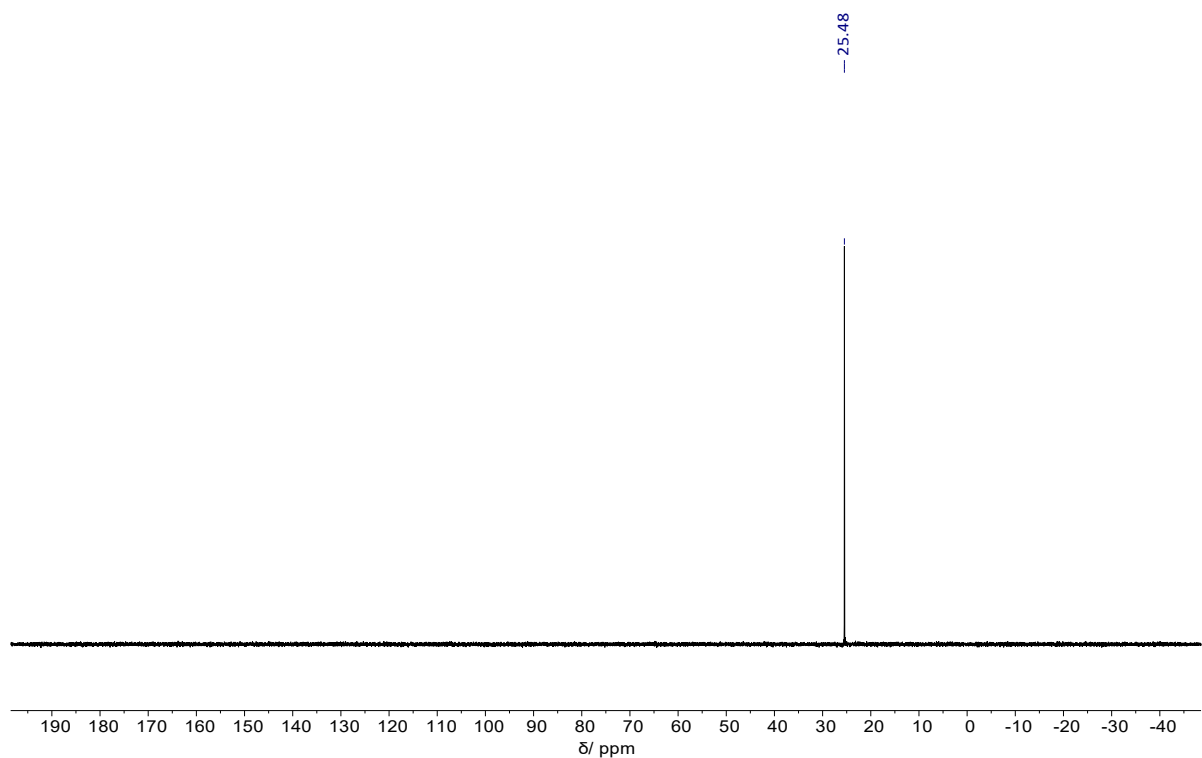

$^{31}\text{P}\{^1\text{H}\}$  NMR ( $\text{CDCl}_3$ , 202.4 MHz):  $\delta$  25.48 (s)



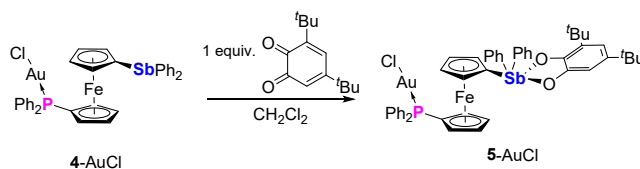

**Compound 5-AuCl:** A solution of 3,5-di-*tert*-butyl-*o*-benzoquinone (33.6 mg, 0.152mmol) in CH<sub>2</sub>Cl<sub>2</sub> (5 mL) was added dropwise to a stirred solution of 4-AuCl (134 mg, 0.152mmol) in CH<sub>2</sub>Cl<sub>2</sub> (5 mL). The resulting yellow solution was stirred for 30 min. The reaction solution was brought to dryness under reduced pressure. This solid was redissolved in CH<sub>2</sub>Cl<sub>2</sub> (3 mL) and precipitated with hexane (20 mL) to obtain a pale yellow solid. This solid was further washed with pentane to afford 5-AuCl as a yellow powder (134 mg, 80%).

## Atlantic Microlab, Inc.

Sample No. 5-AuCl

6180 Atlantic Blvd. Suite M  
Norcross, GA 30071  
www.atlanticmicrolab.com

Company/School Texas A&M University

Dept. Chemistry

Address 580 Ross Street

City, State, Zip College Station, TX 77843

Professor/Supervisor: Francois Gabbai

Name Benyu Zhou

Date 10/04/2023

PO# / CC# A30854505

Phone (281) 935-6107

| Element | Theory | Found |  | Single <input checked="" type="checkbox"/>                                                                                                                                            | Duplicate <input type="checkbox"/> |
|---------|--------|-------|--|---------------------------------------------------------------------------------------------------------------------------------------------------------------------------------------|------------------------------------|
| C       | 52.51  | 52.77 |  | Elements Present: C H O Fe P Cl Sb Zu                                                                                                                                                 |                                    |
| H       | 4.41   | 4.58  |  | Analyze for: C H                                                                                                                                                                      |                                    |
|         |        |       |  | Hygroscopic <input type="checkbox"/> Explosive <input type="checkbox"/>                                                                                                               |                                    |
|         |        |       |  | M.P. _____ B.P. _____                                                                                                                                                                 |                                    |
|         |        |       |  | To be dried: Yes <input checked="" type="checkbox"/> No <input type="checkbox"/>                                                                                                      |                                    |
|         |        |       |  | Temp. _____ Vac. _____ Time _____                                                                                                                                                     |                                    |
|         |        |       |  | Rush Service <input type="checkbox"/> <small>Rush service guarantees analyses will be completed and results available by 5 PM EST on the day the sample is received by 11 AM.</small> |                                    |
|         |        |       |  | Include Email Address or FAX # Below                                                                                                                                                  |                                    |
|         |        |       |  | benyuzhou1995@tamu.edu                                                                                                                                                                |                                    |

Date Received OCT 09 2023

Date Completed OCT 10 2023

Remarks:

**Elemental Analysis:** Calculated for C<sub>48</sub>H<sub>48</sub>O<sub>2</sub>PClFeSbAu: C 52.51, H, 4.41; Found: C 52.77, H 4.58.

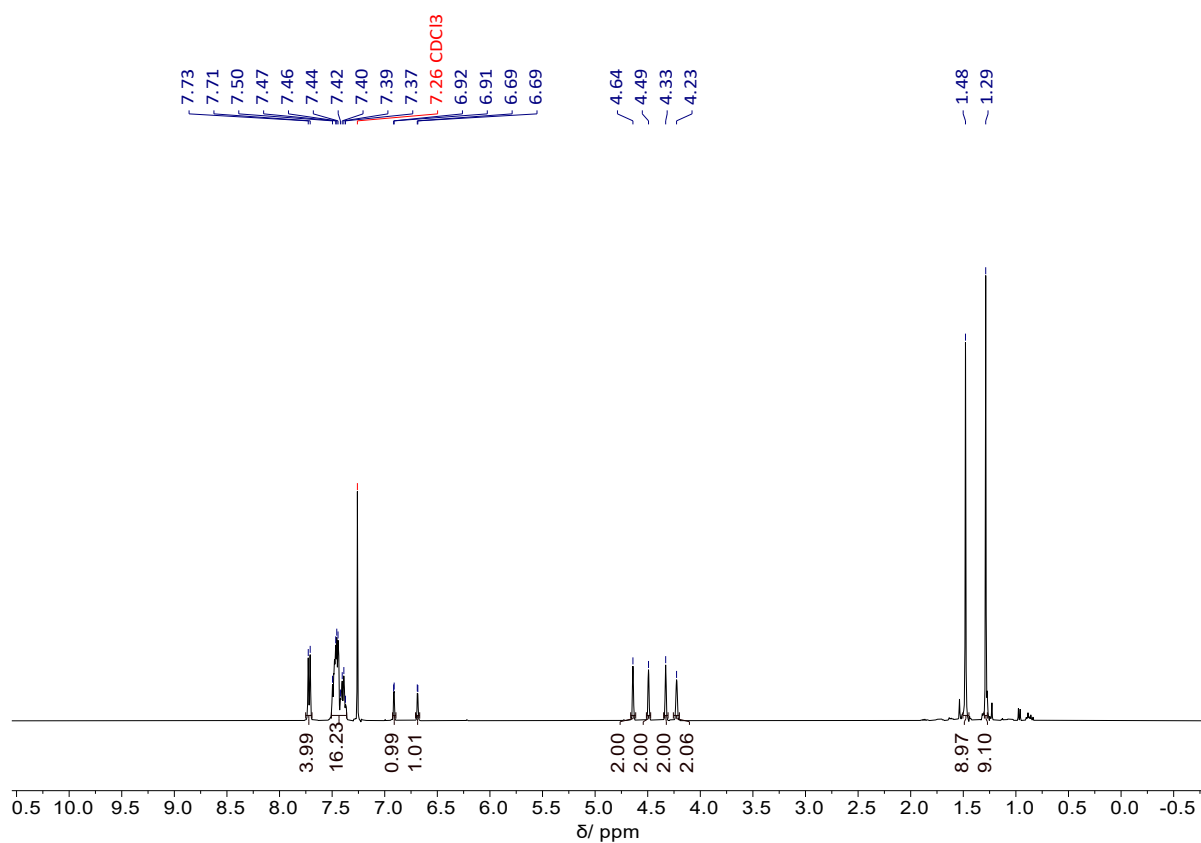

**$^1\text{H}$  NMR** ( $\text{CDCl}_3$ , 400 MHz):  $\delta$  7.72 (d,  $^3J_{\text{H-H}}=7.4$  Hz, 4H), 7.50-6.69 (m, 16H, Ph-*H*), 6.91 (d,  $^4J_{\text{H-H}} = 2.1$  Hz, 1H, Catecholate-*H*), 6.61 (d,  $^4J_{\text{H-H}} = 2.1$  Hz, 1H, Catecholate-*H*), 4.64 (s, 1H, Ferrocene-*H*), 4.49 (s, 1H, Ferrocene-*H*), 4.33 (s, 1H, Ferrocene-*H*), 4.23 (s, 1H, Ferrocene-*H*), 1.48 (s, 9H,  $\text{C}(\text{CH}_3)_2$ ), 1.29 (s, 9H,  $\text{C}(\text{CH}_3)_3$ ).

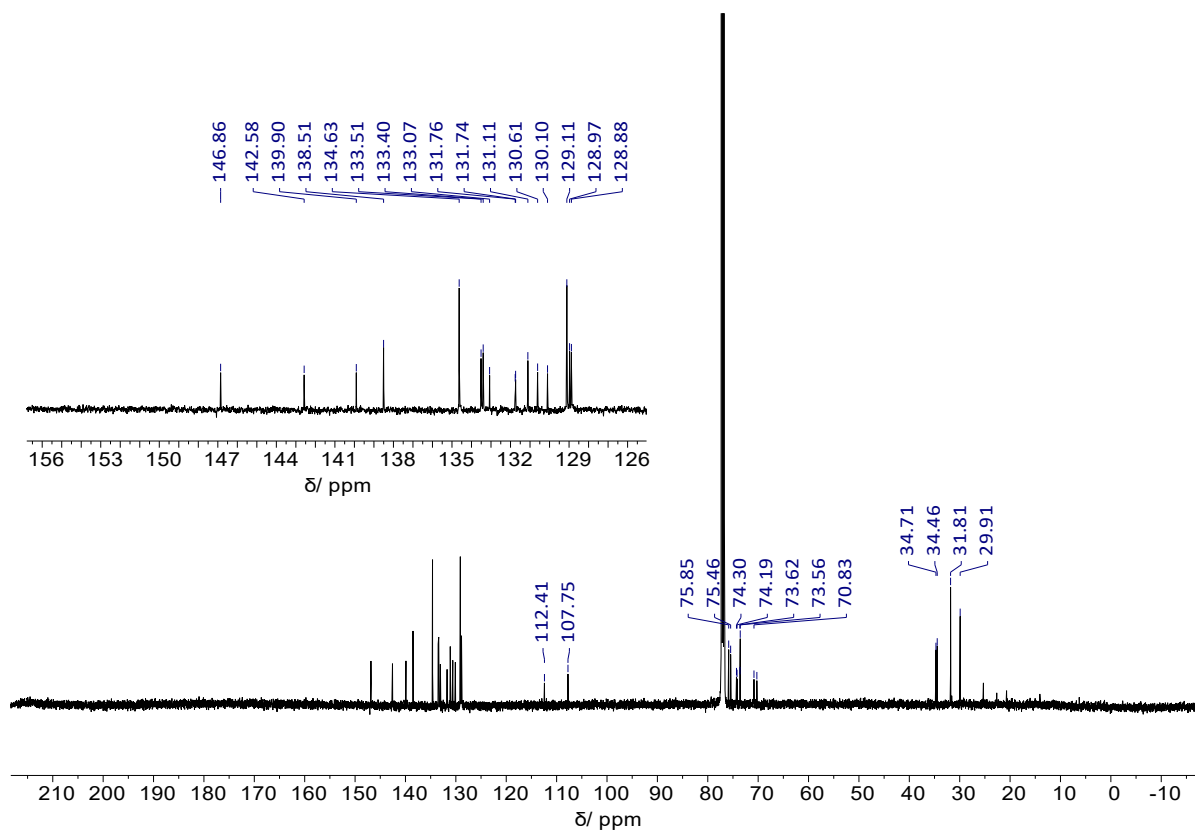

$^{13}\text{C}\{^1\text{H}\}$  NMR ( $\text{CDCl}_3$ , 125.8 MHz):  $\delta$  146.9 (s), 142.6(s), 139.9(s), 138.5 (s), 134.6 (s), 133.5 (s), 133.4 (s), 133.07 (s), 131.8 (s), 131.7 (s), 131.1 (s), 130.6 (s), 130.1 (s), 129.1 (s), 129.0 (s), 128.9 (s), 112.4 (s), 107.8 (s), 75.8 (s), 75.5 (s), 74.3 (s), 74.2 (s), 73.6 (s), 73.6 (s), 70.8 (s), 70.3 (s), 34.7 (s), 34.5 (s), 31.8 (s), 29.9 (s).

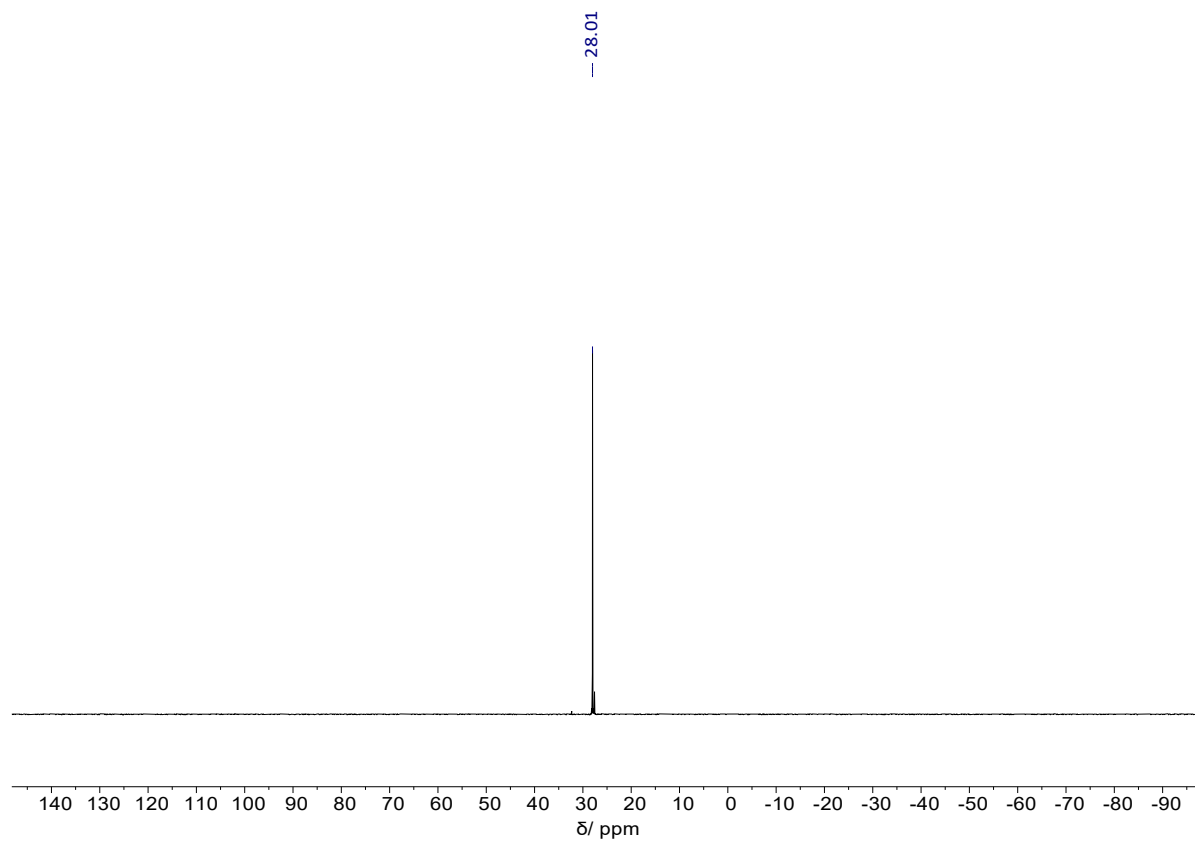

$^{31}\text{P}\{^1\text{H}\}$  NMR ( $\text{CDCl}_3$ , 202.4 MHz):  $\delta$  28.01 (s)

### 3 Catalytic isomerization of propargylic amides

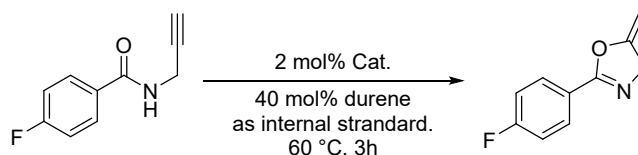

Under an N<sub>2</sub> atmosphere, a CDCl<sub>3</sub> solution (0.7 mL) of the gold catalyst (0.0040 mmol) and durene (0.0800 mmol, internal standard) was added to a J-Young NMR tube containing the substrate (0.200 mmol). The resulting solution was heated at 50 °C for 3 h. For the first 2 h, the *in situ* <sup>1</sup>H NMR spectra of the reaction solution were recorded periodically, and then a final spectrum was recorded at 3 h. The conversions were calculated by integrating the characteristic methylene peaks of the product and the starting substrate respectively. The results are summarized in **Figure S1-S4** and **Table S1**.

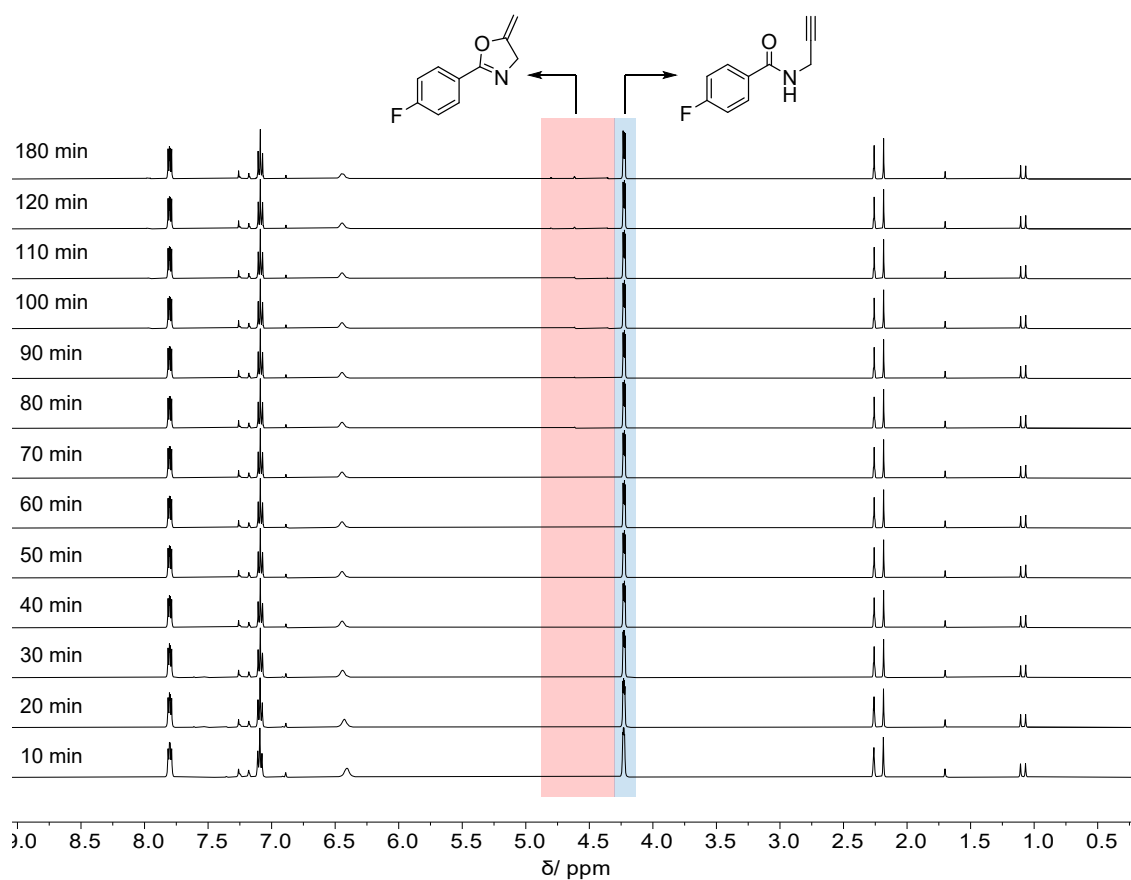

**Figure S1.** <sup>1</sup>H NMR spectra recorded *in situ* during the course of catalysis using 2-AuCl as the catalyst.

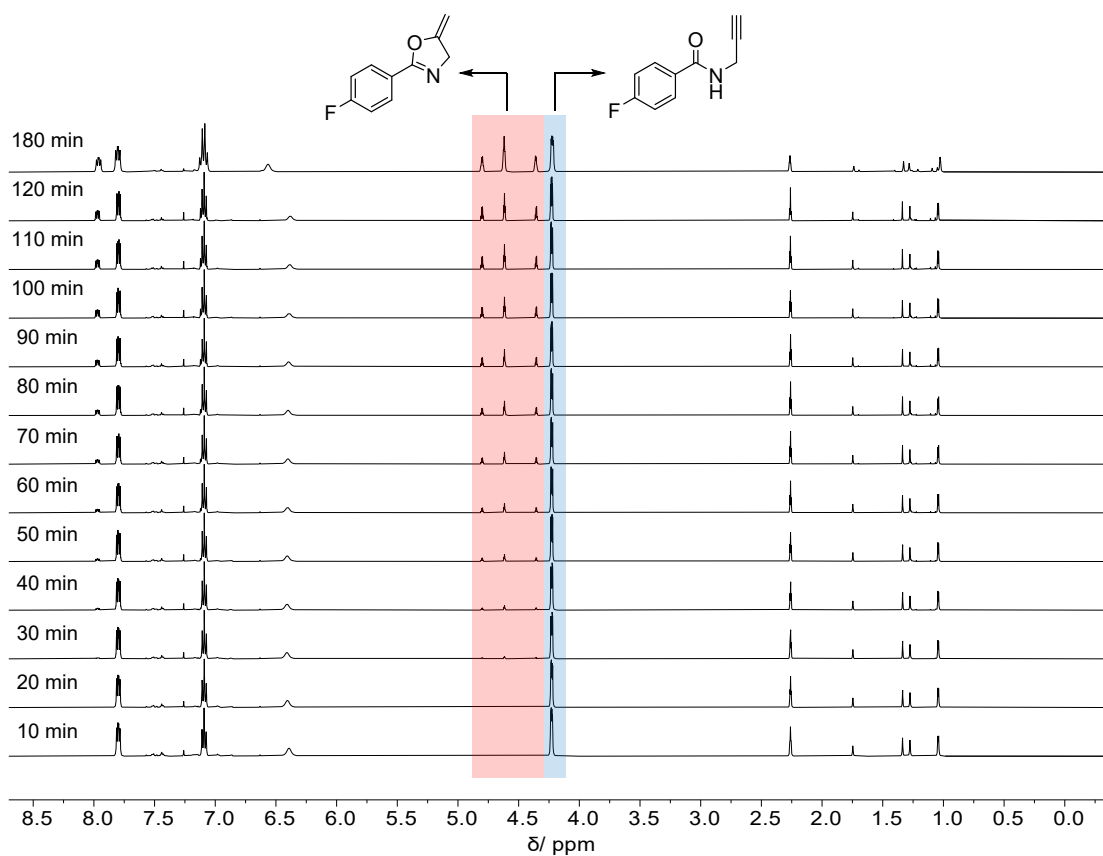

**Figure S2.**  $^1\text{H}$  NMR spectra recorded *in situ* during the course of catalysis using **3**-AuCl as the catalyst.

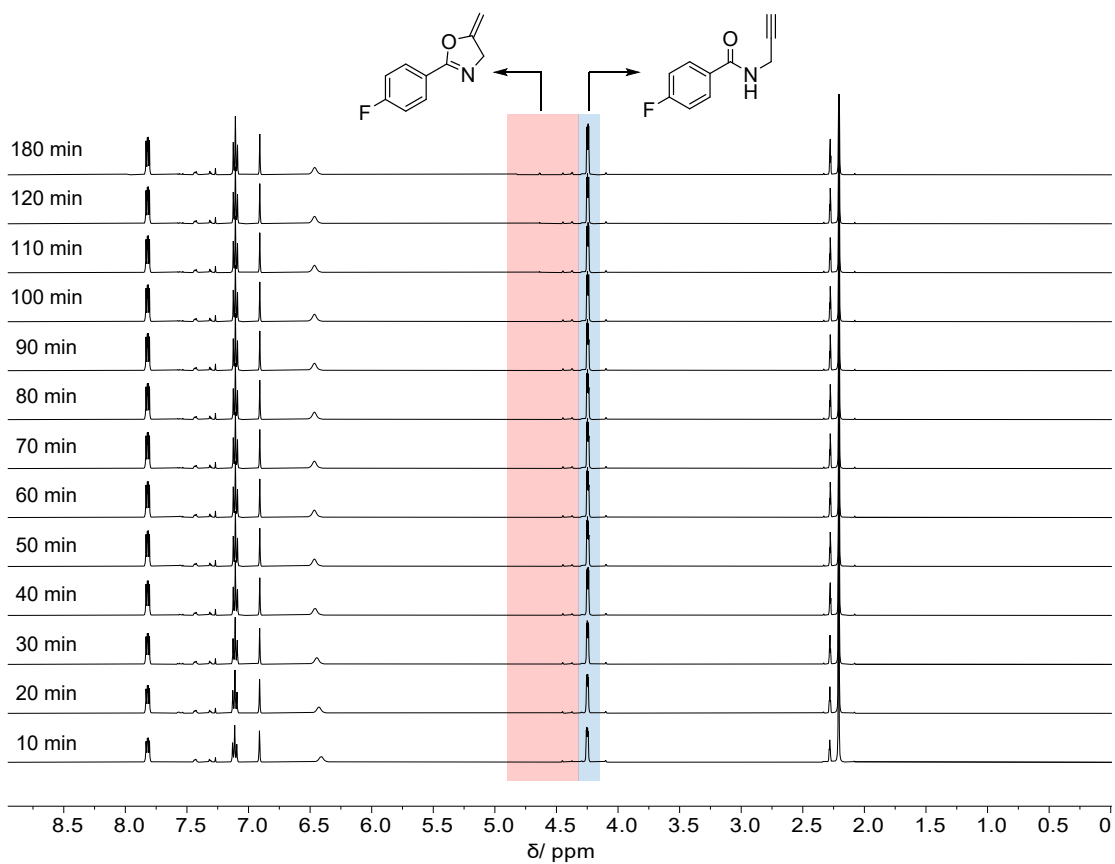

**Figure S3.**  $^1\text{H}$  NMR spectra recorded *in situ* during the course of catalysis using **4**-AuCl as the catalyst.

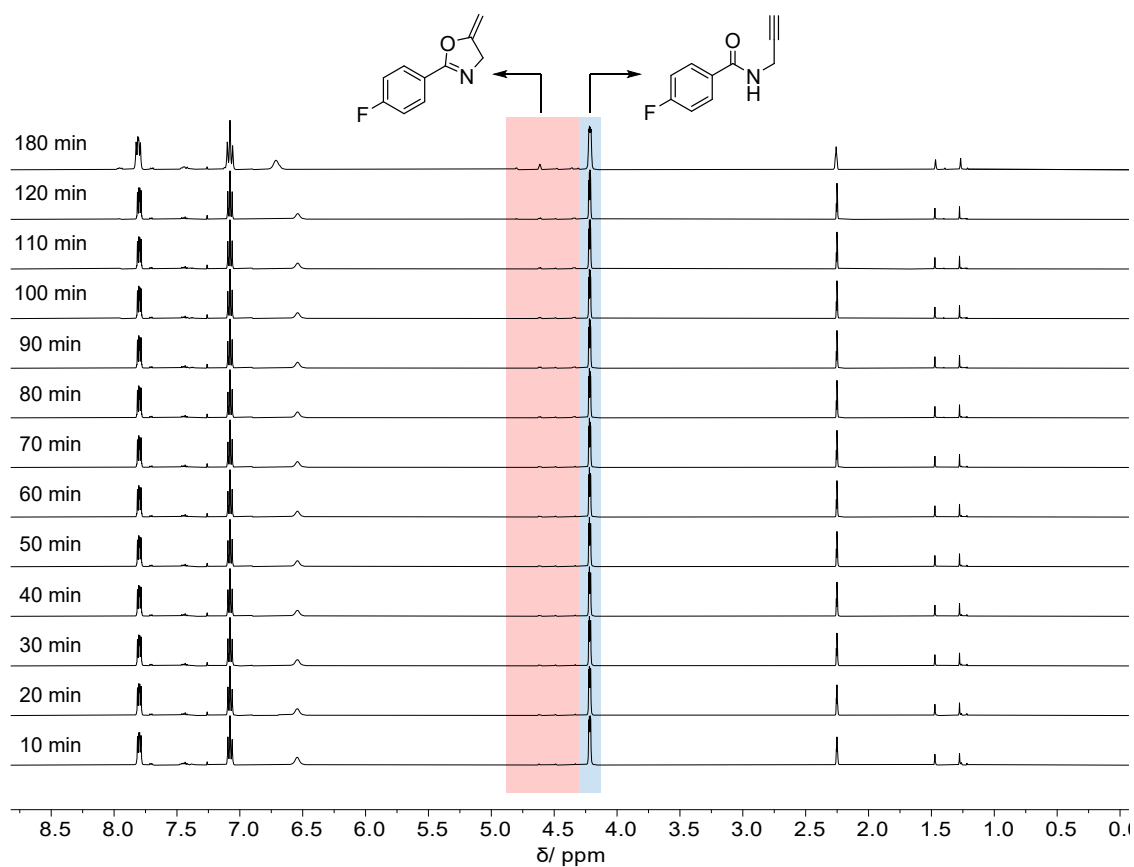

**Figure S4.**  $^1\text{H}$  NMR spectra recorded *in situ* during the course of catalysis using **5**-AuCl as the catalyst.

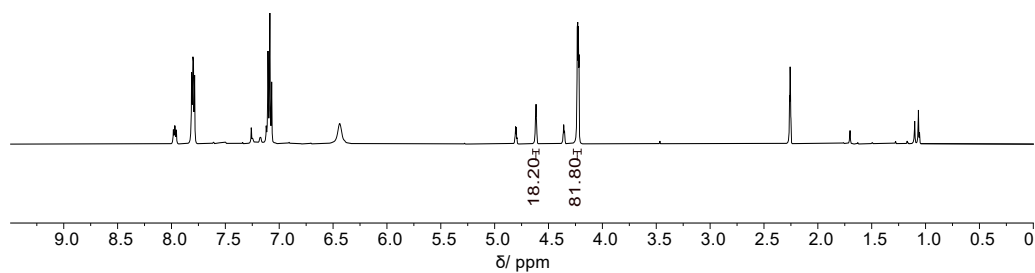

**Figure S5.**  $^1\text{H}$  NMR spectra recorded *in situ* after 2 hours of catalysis reaction using **2**-AuCl/AgOTf as the catalyst.

**Table S1. Catalytic results for the isomerization of propargyl amide 6 after 3 h.**

| Entry | Catalyst       | Conversion |
|-------|----------------|------------|
| 1     | <b>2</b> -AuCl | 4%         |
| 2     | <b>3</b> -AuCl | 39%        |
| 3     | <b>4</b> -AuCl | 2%         |
| 4     | <b>5</b> -AuCl | 6%         |

## 4 Computational results

### 4.1 Cartesian Coordinates for the optimized structure of **3**-AuCl in gas phase

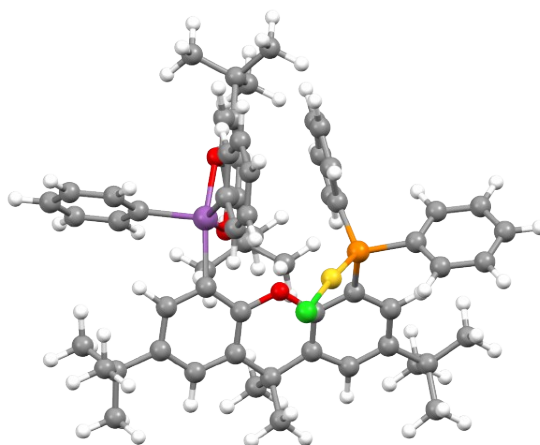

|    |                   |                   |                   |   |                   |                   |                   |
|----|-------------------|-------------------|-------------------|---|-------------------|-------------------|-------------------|
| Au | 5.88566014871952  | 10.66148353560288 | 16.62172234561826 | H | 11.25230761399673 | 11.29178521813795 | 20.01172417984548 |
| Sb | 9.13390447715088  | 9.65320767214329  | 12.82366264706481 | H | 11.69655058492618 | 9.65101640726039  | 19.48668696555735 |
| Cl | 5.21635560070618  | 8.67940487094291  | 17.59451749747783 | H | 9.98667526268807  | 10.16776093781365 | 19.44026576754164 |
| P  | 6.60432193049341  | 12.64882302616172 | 15.85446941549307 | C | 12.67197302490770 | 11.47425196075051 | 17.61847857866494 |
| O  | 10.42709217373625 | 11.19541553847681 | 13.07917922246952 | H | 12.93222570150240 | 12.29708794915085 | 18.30436266654302 |
| O  | 8.77544873613386  | 10.76258511428386 | 11.11976388344268 | H | 12.81573223865855 | 11.82236687800786 | 16.58365628422839 |
| O  | 9.10494235406336  | 11.11044420146304 | 15.76660171815426 | H | 13.37534715870334 | 10.64681334967227 | 17.80438924009887 |
| C  | 11.64220134931935 | 8.69188207835856  | 16.87722874329178 | C | 12.25690679004993 | 6.35093430499976  | 15.97490805941807 |
| H  | 12.37147416424127 | 8.56674393836305  | 17.67956568802752 | C | 11.25145286412999 | 5.18447632740541  | 16.04798058746672 |
| C  | 11.48303839044306 | 7.67394387596884  | 15.93342426244928 | H | 10.62764190826596 | 5.25998785910453  | 16.95398181214921 |
| C  | 10.60278947346688 | 7.92872632935734  | 14.86417654827608 | H | 11.78486140538266 | 4.21870346769697  | 16.07394387488531 |
| H  | 10.52752088204997 | 7.20090032360225  | 14.05142969347865 | H | 10.57775800386299 | 5.17335200488035  | 15.17597103782891 |
| C  | 9.86389173274248  | 9.10674870673805  | 14.78223666589967 | C | 13.10835518134428 | 6.21974647687949  | 14.69512426463727 |
| C  | 8.18157194015901  | 13.07090805312748 | 16.67961263840104 | H | 12.48893104391184 | 6.22754795461574  | 13.78362927507086 |
| C  | 8.30395571680124  | 14.20698269386964 | 17.49031969985508 | H | 13.67479545886536 | 5.27262892774471  | 14.70782521517559 |
| H  | 7.50251545927003  | 14.94575885331672 | 17.47083212414080 | H | 13.82833562504346 | 7.05187819545504  | 14.61831141572458 |
| C  | 9.40752623649001  | 14.38514225675521 | 18.33496220541916 | C | 13.18960213144489 | 6.26879295697990  | 17.19080867474865 |
| C  | 10.33819740779507 | 13.33725165244215 | 18.40152191757232 | H | 13.95635362614942 | 7.06113771836864  | 17.17090205862232 |
| H  | 11.16757708367901 | 13.41344502981361 | 19.11027835848584 | H | 13.71432271610603 | 5.29940740702568  | 17.19218989115009 |
| C  | 11.21361757160567 | 11.01261651017780 | 17.83480819790329 | H | 12.63164338718844 | 6.34744954491394  | 18.13872564117792 |
| C  | 10.90914678949921 | 9.89206933026996  | 16.84176913199891 | C | 9.59657370862590  | 15.64025046298174 | 19.19665809717344 |
| C  | 9.96547237901035  | 10.04187900782127 | 15.82267767967206 | C | 8.45379675749180  | 16.64652203704658 | 19.00030868968190 |
| C  | 9.20992509702175  | 12.10897131730467 | 16.68691546141750 | H | 8.37980302707061  | 16.98230694922499 | 17.95264953300749 |
| C  | 10.25675067386642 | 12.18214164410921 | 17.61385951401340 | H | 8.63335056940069  | 17.53693035639989 | 19.62466737362764 |
| C  | 11.02482891603512 | 10.49957873625622 | 19.28023790842932 | H | 7.47946079544643  | 16.22314901681175 | 19.29595256982115 |

|   |                   |                   |                   |   |                   |                   |                   |
|---|-------------------|-------------------|-------------------|---|-------------------|-------------------|-------------------|
| C | 9.64276807461840  | 15.24262189412353 | 20.68542475697564 | H | 6.00408597255622  | 15.31096136939605 | 14.66835334463405 |
| H | 8.70696791237561  | 14.74326065283173 | 20.98654454451842 | C | 4.62621581239429  | 16.27047622663436 | 16.03251300121635 |
| H | 9.77560120939156  | 16.13774324272070 | 21.31684920736789 | H | 4.57651843322555  | 17.19217762032175 | 15.44527241371371 |
| H | 10.47663371531235 | 14.55567883423318 | 20.90221541142692 | C | 3.88675150759071  | 16.14967060059410 | 17.21353310732598 |
| C | 10.92234940782723 | 16.32054424413170 | 18.80044100432123 | H | 3.25751326729766  | 16.97807132724386 | 17.55243873665725 |
| H | 11.78508384446634 | 15.65234435473898 | 18.95597432425173 | C | 3.94312734825421  | 14.96477777827067 | 17.95512733401334 |
| H | 11.08542104791522 | 17.22847348279264 | 19.40612125264318 | H | 3.35733999024333  | 14.86138403253030 | 18.87312585312621 |
| H | 10.91011997476854 | 16.61168646939224 | 17.73692950438583 | C | 4.73998208359830  | 13.90302761489035 | 17.51974966575999 |
| C | 10.21327217923372 | 8.19760418265497  | 11.73449798769585 | H | 4.77735614419157  | 12.96946865034852 | 18.09196513917585 |
| C | 11.58614024766456 | 8.40115300778718  | 11.52893189028872 | C | 10.57869638358610 | 11.98545012363735 | 11.98895909639191 |
| H | 12.07874081256172 | 9.29202261168440  | 11.93346621491534 | C | 9.69095372410420  | 11.72076004586626 | 10.91739631554037 |
| C | 12.32611308219664 | 7.45517193630176  | 10.81297553351940 | C | 9.75946255147175  | 12.46795879423007 | 9.74368797056003  |
| H | 13.39648220884822 | 7.61269764987849  | 10.64950311400284 | H | 9.05831998406575  | 12.22215149518639 | 8.94156131736894  |
| C | 11.70065628642323 | 6.30794782843638  | 10.31149113283657 | C | 10.68997090830658 | 13.51582172790498 | 9.62846981582054  |
| H | 12.28351350611240 | 5.56682796560438  | 9.75634343497780  | C | 11.54676859855078 | 13.76833017277652 | 10.71127373496263 |
| C | 10.33173057377541 | 6.10732670284182  | 10.51677614131187 | H | 12.27214519576572 | 14.57457784020662 | 10.62603417142079 |
| H | 9.84287086705439  | 5.21096100134386  | 10.12335389465697 | C | 11.52369833305880 | 13.02114381715773 | 11.90892305508161 |
| C | 9.58305377343014  | 7.05438111373512  | 11.22538478639016 | C | 12.47040166914620 | 13.31498145231814 | 13.08292735295125 |
| H | 8.51030058082253  | 6.89633226942281  | 11.38203074895443 | C | 13.30136415485402 | 12.05729104516199 | 13.41678055234591 |
| C | 7.08200333057512  | 9.13042337407779  | 12.86711316387721 | H | 12.66345893631813 | 11.22894821494105 | 13.76009872101209 |
| C | 6.26776795308612  | 9.31119533334616  | 11.73642737744254 | H | 14.02868678703033 | 12.28633920630866 | 14.21565004676602 |
| H | 6.67450945963951  | 9.78225480979480  | 10.83963517816535 | H | 13.86695466283916 | 11.72070718390139 | 12.53105065027516 |
| C | 4.93472215784457  | 8.89544101470977  | 11.78386744619038 | C | 11.64505861537746 | 13.73327272694814 | 14.31770108375089 |
| H | 4.29467169323368  | 9.02917036494039  | 10.90592491668846 | H | 11.07851014618821 | 14.65744277245461 | 14.10941079828839 |
| C | 4.41657147203803  | 8.31614402465974  | 12.94944209365305 | H | 12.30888831430712 | 13.93187540122013 | 15.17787006272850 |
| H | 3.36903842910004  | 8.00139600274125  | 12.98343089337988 | H | 10.93314023507928 | 12.94598112997152 | 14.60679792889299 |
| C | 5.22894158545525  | 8.14169929307511  | 14.07261383208000 | C | 13.45062368925113 | 14.45213902972715 | 12.75876309169482 |
| H | 4.82990917332171  | 7.71623166848828  | 14.99702546058573 | H | 14.09080824224486 | 14.20681345220662 | 11.89512837410433 |
| C | 6.56943614753565  | 8.54844511373854  | 14.03268995011992 | H | 14.10918101271159 | 14.62564040430368 | 13.62608581641463 |
| H | 7.20119117697588  | 8.41114674527633  | 14.91775293461262 | H | 12.92778620048774 | 15.39887021682869 | 12.54443112171411 |
| C | 6.81961574702131  | 12.88206263426639 | 14.06517562905079 | C | 10.73300936206206 | 14.33877779889320 | 8.33172421507413  |
| C | 5.81140180017795  | 12.41809287325847 | 13.20536656723773 | C | 9.344873858985188 | 14.97032909713708 | 8.08021281544216  |
| H | 4.98902449581099  | 11.81191462161810 | 13.60130022817280 | H | 8.56600435992955  | 14.20352332721408 | 7.96224483900723  |
| C | 5.86650610019524  | 12.73222291542360 | 11.84564660091280 | H | 9.36029505739065  | 15.57935693271281 | 7.15937364850233  |
| H | 5.08279541864747  | 12.36844776638689 | 11.17489944755940 | H | 9.05997762282498  | 15.62425449662627 | 8.92093829480959  |
| C | 6.92440571799765  | 13.49510703202643 | 11.34266925633341 | C | 11.09551288364022 | 13.41415270845642 | 7.15260904504706  |
| H | 6.97534454183078  | 13.72944845237723 | 10.27562269719493 | H | 12.08464696875011 | 12.95312474739637 | 7.31093281842577  |
| C | 7.94400238197428  | 13.93470196912159 | 12.19318082104428 | H | 11.12589186557331 | 13.98328281397893 | 6.20681911663428  |
| H | 8.78995096083302  | 14.50058107087284 | 11.79116156101550 | H | 10.36234897558555 | 12.60008111772915 | 7.03500957314034  |
| C | 7.89404238652608  | 13.62907452633036 | 13.55544913136508 | H | 11.76850107333089 | 15.47021565447681 | 8.39263970844498  |
| H | 8.68654154313975  | 13.97392884220047 | 14.22591567973530 | H | 11.55030174303625 | 16.17795398940302 | 9.20960759693811  |
| C | 5.49429523514922  | 14.02551519569507 | 16.34069277604022 | H | 11.75686257433290 | 16.03619804966922 | 7.44631753884160  |
| C | 5.42882845836152  | 15.21335476132142 | 15.59401867511496 | H | 12.79008507866189 | 15.08133697653988 | 8.53553497197039  |

## 4.2 Cartesian Coordinates for the optimized structure of **6** in gas phase

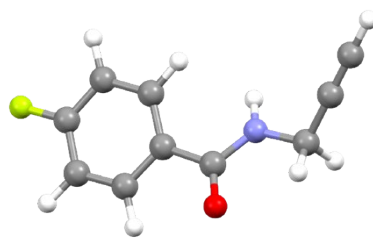

|   |                   |                   |                   |
|---|-------------------|-------------------|-------------------|
| C | -1.98708616752844 | 0.23128841822637  | 0.56793872757902  |
| C | -0.70873059356555 | -0.15814520337334 | 0.16437673552448  |
| C | 0.23298238405610  | 0.79562996769322  | -0.25729488814071 |
| C | -0.13604666470422 | 2.15060973753853  | -0.29112558037699 |
| C | -1.40452316763506 | 2.55624150448802  | 0.11772902591658  |
| C | -2.31214647549313 | 1.58680790378915  | 0.54539230782720  |
| H | -2.73683250197589 | -0.49705942096637 | 0.88653244850375  |
| H | -0.47016397288859 | -1.22601131842740 | 0.14653110068780  |
| H | 0.59779719863823  | 2.87733603459617  | -0.64908488299405 |
| H | -1.70539212071832 | 3.60688245120195  | 0.10701805991443  |
| F | -3.53320849934720 | 1.96705847538044  | 0.93597916420405  |
| C | 1.61516021935345  | 0.45090603612031  | -0.72937076725867 |
| N | 2.11652564599726  | -0.74276350155773 | -0.27999537641738 |
| H | 1.62398587004711  | -1.26871472516716 | 0.43015752003653  |
| C | 3.42917070204261  | -1.21258603875802 | -0.69076390659618 |
| H | 4.19931640626565  | -0.98759417560477 | 0.07556576535022  |
| H | 3.70927536097257  | -0.63197152769998 | -1.58775560893512 |
| C | 3.43424835204691  | -2.64455136231312 | -0.97351698164707 |
| C | 3.43292759774467  | -3.83911353759991 | -1.19064725950199 |
| H | 3.43796648508251  | -4.89442912199442 | -1.39146705364830 |
| O | 2.25157394160927  | 1.19727940442809  | -1.46179855002762 |



### 4.3 Cartesian Coordinates for the optimized structure of the adduct between 3-AuCl and 6 in gas phase

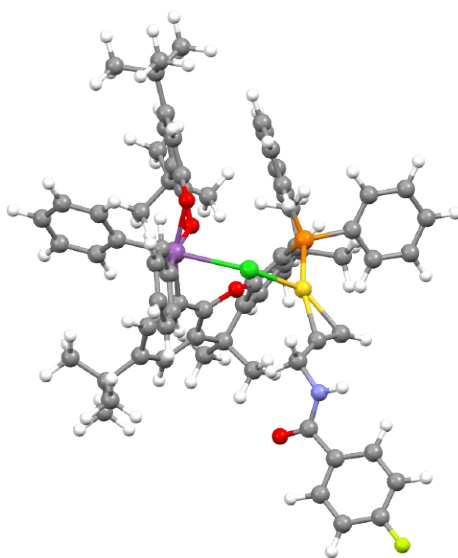

|    |                   |                   |                    |   |                   |                   |                    |
|----|-------------------|-------------------|--------------------|---|-------------------|-------------------|--------------------|
| Au | 5.68638341912743  | 11.07471591254811 | 16.09384432621546  | H | 11.89650893978317 | 16.51973276036935 | 19.87646588984816  |
| Sb | 8.94249277714644  | 9.42284411079715  | 12.99670926192972  | H | 12.41616115226528 | 15.08146848551420 | 18.96560469975486  |
| Cl | 6.25485970900579  | 9.81977834364061  | 14.05307453687795  | C | 10.73773951725538 | 16.64966200698860 | 17.43302593405372  |
| P  | 6.73930094725957  | 13.12639182676530 | 15.61679188272530  | H | 11.54342766695565 | 16.20719625313467 | 16.82434872412166  |
| O  | 9.66776948597368  | 11.31709597773741 | 13.43571337600213  | H | 11.09078171250276 | 17.61821810967572 | 17.82678504443854  |
| O  | 8.21160437922452  | 10.51076099104202 | 11.42734845169020  | H | 9.88414429319112  | 16.85026038891819 | 16.76521597551020  |
| O  | 8.70507155801116  | 10.87678033222977 | 16.06123652310529  | C | 10.75448275969926 | 8.89403831658228  | 11.96434674234503  |
| C  | 11.08064028593855 | 8.33827073106474  | 17.24795144192520  | C | 11.99070171595314 | 8.77467842493449  | 12.61503507501338  |
| H  | 11.70051758594046 | 8.14093660530342  | 18.12216509574899  | H | 12.06389075802393 | 8.93077232833769  | 13.69523282451632  |
| C  | 11.01334740137600 | 7.38323657417802  | 16.22752562916459  | C | 13.14761536180879 | 8.46257196655051  | 11.89218493739672  |
| C  | 10.25116705322555 | 7.71493812628985  | 15.09329509923006  | H | 14.10530797981057 | 8.36938194894496  | 12.41437634576659  |
| H  | 10.25675693598762 | 7.03622125988953  | 14.23339064594649  | C | 13.08155247473514 | 8.27987875095944  | 10.50776690283301  |
| C  | 9.53150149370719  | 8.90786834791421  | 14.99807873143526  | H | 13.98675198607199 | 8.03950563804617  | 9.94157359637136   |
| C  | 8.32876176618603  | 13.17540498786012 | 16.52411301508850  | C | 11.85580642834997 | 8.41338865661777  | 9.84815687652337   |
| C  | 8.77321477116582  | 14.35460721414614 | 17.13471363321944  | H | 11.79879848609054 | 8.28398725965216  | 8.76290457147707   |
| H  | 8.22739467456531  | 15.28037347197706 | 16.93377716384359  | C | 10.69932160384329 | 8.71829765415741  | 10.57274803664858  |
| C  | 9.86919849812902  | 14.37330424824656 | 18.00906825391289  | H | 9.74919040188458  | 8.83329606427696  | 10.04367295089323  |
| C  | 10.43465358823491 | 13.13646900970673 | 18.35525933527704  | C | 7.72422313357898  | 7.72422313357898  | 12.42613032837637  |
| H  | 11.21955922973877 | 13.10455949364339 | 19.11045667693244  | C | 7.28716656149743  | 7.59428228120503  | 11.11087007092833  |
| C  | 10.37183072441685 | 10.55168714562431 | 18.35019253962256  | H | 7.46299441128124  | 8.39304423487424  | 10.386644578345566 |
| C  | 10.35885071410430 | 9.54163948257147  | 17.20430608421201  | C | 6.56540105575982  | 6.45476579317976  | 10.7358927576654   |
| C  | 9.53508405827220  | 9.78014659108838  | 16.09689003912056  | H | 6.20018427573829  | 6.36020006782784  | 9.70833709849043   |
| C  | 9.03358632972934  | 11.98103032840715 | 16.782888420975183 | C | 6.30644888409139  | 5.44593042859088  | 11.66753929447809  |
| C  | 10.00628397520079 | 11.92747137162057 | 17.79156536429197  | H | 5.74186010857005  | 4.55569768365969  | 11.37018922232178  |
| C  | 9.24692579861333  | 10.15758121553701 | 19.34374011669869  | C | 6.75269627666393  | 5.58497457965065  | 12.98547858632342  |
| H  | 9.18966134117167  | 10.88609128272335 | 20.17045636261803  | H | 6.53582671952335  | 4.80810124213489  | 13.72565567427902  |
| H  | 9.44112439963784  | 9.15514075736762  | 19.76067910947530  | H | 6.46886590277125  | 6.72435772284500  | 13.36614511233412  |
| H  | 8.26789245794401  | 10.13158543107289 | 18.83714243752305  | H | 7.78210609050158  | 6.83904731670606  | 14.40872236753720  |
| C  | 11.71670935551569 | 10.56726483980086 | 19.08585952222936  | C | 6.98805587340064  | 13.61555377741038 | 13.88564169206601  |
| H  | 11.69546909989576 | 11.27988005548361 | 19.92435237018954  | C | 6.18737602576294  | 13.04964922631742 | 12.88068416377116  |
| H  | 12.54160716125673 | 10.84088451252955 | 18.40829583216528  | H | 5.49201654584103  | 12.24221485150221 | 13.11911477800571  |
| H  | 11.93652609212083 | 9.58405082192428  | 19.52730542781885  | C | 6.30768960532410  | 13.50230159355190 | 11.56547077708485  |
| C  | 11.74735005314703 | 6.03758450665855  | 16.27982891007861  | H | 5.69942601452884  | 13.04366520742280 | 10.78099297693453  |
| C  | 10.71605437138496 | 4.90199845771021  | 16.11909422217919  | C | 7.22199535193126  | 14.50958760000341 | 11.24739002793820  |
| H  | 9.96981851787078  | 4.93431928688737  | 16.93044048268968  | H | 7.32667964097133  | 14.84376714078130 | 10.21196539731568  |
| H  | 11.21855807131155 | 3.91998814645802  | 16.14922053479961  | C | 8.02335290939674  | 15.07211959825057 | 12.24589796808561  |
| H  | 10.17657785946085 | 4.97383311783188  | 15.16076730958436  | H | 8.75778891078568  | 15.84173157540925 | 11.99217977558448  |
| C  | 12.77423333106306 | 5.96969491956271  | 15.13135950828058  | C | 7.90369519755201  | 14.63052489945094 | 13.56446165589850  |
| H  | 12.29564791958619 | 6.06523127246330  | 14.14331674426207  | H | 8.52565140814842  | 15.07296199656505 | 14.34663400351237  |
| H  | 13.31057780456624 | 5.00540972986632  | 15.15388998574398  | C | 5.81973265476261  | 14.53316255647592 | 16.36005280208584  |
| H  | 13.51791569999951 | 6.77937044000959  | 15.22303182769112  | C | 5.29624802673382  | 15.57647666493679 | 15.58295963504378  |
| C  | 12.48755704989720 | 5.83654130454839  | 17.60901186567418  | H | 5.46129804661695  | 15.58928926896103 | 14.50195222329515  |
| H  | 13.27358389278324 | 6.59521264088740  | 17.76047805583688  | C | 4.56420462775279  | 16.60408213048989 | 16.19057685845828  |
| H  | 12.97672700093598 | 4.84867780931004  | 17.61523586920434  | H | 4.15891141039633  | 17.41304200838957 | 17.41304200838957  |
| H  | 11.79783645949466 | 5.87290852243559  | 18.46877580024902  | C | 4.35596924648161  | 16.60151765499822 | 17.57125655065176  |
| C  | 10.34698185968481 | 15.70976559196509 | 18.59131571755540  | H | 3.78843361397294  | 17.40906812701244 | 18.04299485282217  |
| C  | 9.20687549036279  | 16.34715012018955 | 19.41146002336901  | C | 4.87382203439367  | 15.5588839441031  | 18.35107160883457  |
| H  | 8.31318392694673  | 16.53643072409191 | 18.794535869207851 | H | 4.71403305110044  | 15.55096651456970 | 19.43350711603974  |
| H  | 9.53234472001649  | 17.31255076478753 | 19.83582580144369  | C | 5.59233238255330  | 14.52615352787940 | 17.74932975565010  |
| H  | 8.90733092488241  | 15.68826874826891 | 20.24390677275585  | H | 5.99657574859415  | 13.71148983616503 | 18.35998207494056  |
| C  | 11.56793969107770 | 15.53552939041275 | 19.50446022441794  | C | 9.85320200194048  | 11.97975769975199 | 12.27529560991025  |
| H  | 11.33973609814539 | 14.91040205377004 | 20.38381057583184  | C | 9.03697182098409  | 11.55502277304261 | 11.19508090596436  |

|   |                   |                   |                   |   |                   |                   |                   |
|---|-------------------|-------------------|-------------------|---|-------------------|-------------------|-------------------|
| C | 9.13517446653488  | 12.14897695622642 | 9.93590280159799  | H | 8.14622399664183  | 13.61585709648277 | 7.70764478905619  |
| H | 8.47827693795841  | 11.77480832811182 | 9.14856413726427  | C | 11.61928084567454 | 13.50045816995990 | 7.78792228437608  |
| C | 10.05651472072166 | 13.18356185710575 | 9.72117047836415  | H | 12.42513229946279 | 13.84560465375484 | 8.45570546498173  |
| C | 10.89213245500576 | 13.55620057204695 | 10.78834806629699 | H | 11.77400680415255 | 13.96396938139534 | 6.79707493824160  |
| H | 11.64051565315413 | 14.32837923341870 | 10.60643827850313 | H | 11.72054100495041 | 12.40752000984773 | 7.68132217018351  |
| C | 10.84415815436014 | 12.96582416047193 | 12.06428457319213 | C | 4.65711882576971  | 9.61291965491113  | 17.21515058940469 |
| C | 11.86546578941935 | 13.32173729881602 | 13.15890323720559 | C | 4.61864417718536  | 10.70386432060108 | 17.86815759617375 |
| C | 12.63683560690146 | 12.04976037530892 | 13.56625770996404 | H | 4.33649959024857  | 11.33014325645522 | 18.70723913709985 |
| H | 11.96301687251195 | 11.31204548556114 | 14.02361531579428 | C | 4.43310473780677  | 8.18310458725186  | 16.91290794886700 |
| H | 13.42387421772423 | 12.30370289036650 | 14.29857580059058 | H | 4.10483397871699  | 8.07927572943658  | 15.86289019762123 |
| H | 13.11406034463680 | 11.58335788629198 | 12.68855174854610 | H | 5.39662818849663  | 7.64848242962345  | 16.99087441164776 |
| C | 11.16099061784441 | 13.89955360143796 | 14.39890405192949 | N | 3.50663018504168  | 7.54966278621415  | 17.82788122989035 |
| H | 10.75372284709020 | 14.90138714550527 | 14.18204020219444 | H | 2.52461343062718  | 7.77979154774177  | 17.75267032931767 |
| H | 11.87656949101860 | 13.99991328362074 | 15.23483086719370 | C | 3.92985136757752  | 6.65650537454445  | 18.78037696262149 |
| H | 10.33703809987814 | 13.25158719791956 | 14.72882833906806 | O | 5.08871014643113  | 6.27194554590069  | 18.85534523419986 |
| C | 12.89239120486933 | 14.35759797932503 | 12.67785679009297 | C | 2.87068276349750  | 6.15411310859063  | 19.71783967286912 |
| H | 13.48228076300058 | 13.98704209456049 | 11.82308254956267 | C | 1.69163258460610  | 6.85785915976918  | 20.01578558458976 |
| H | 13.59535855671815 | 14.58153857250249 | 13.49808897786023 | C | 3.11458724514191  | 4.92982090288515  | 20.36244238888797 |
| H | 12.41347278782014 | 15.30677743857657 | 12.38401599347937 | C | 0.76151169367700  | 6.34325567471625  | 20.92058066717856 |
| C | 10.22999466570227 | 13.86114485865145 | 8.35265721990735  | H | 1.49733375714387  | 7.84011517220988  | 19.57404245296621 |
| C | 10.12349271379361 | 15.39191354495527 | 8.49879094199986  | C | 2.19155759238689  | 4.39734230051036  | 21.25946504137551 |
| H | 9.13996749516977  | 15.68046371735898 | 8.90634244259414  | H | 4.04917393475183  | 4.40750799301114  | 20.14206621995887 |
| H | 10.24428831209333 | 15.88470317626832 | 7.51802676960761  | C | 1.02392700387503  | 5.11402290980894  | 21.52342304496070 |
| H | 10.89615096521030 | 15.79462466936868 | 9.17278621297293  | H | -0.15466815643235 | 6.88226091637650  | 21.17396397082723 |
| C | 9.16623291783461  | 13.40388610046285 | 7.34487280513191  | H | 2.36057345969515  | 3.44163150143188  | 21.76199810771200 |
| H | 9.23736365403416  | 12.32364183352279 | 7.13820828317830  | F | 0.13496586354459  | 4.61366585036466  | 22.38796780114220 |
| H | 9.30226377488435  | 13.93523663793212 | 6.38795465885778  |   |                   |                   |                   |

4.4 Thermodynamic parameters of the optimized structures. All energies are in Hartree.

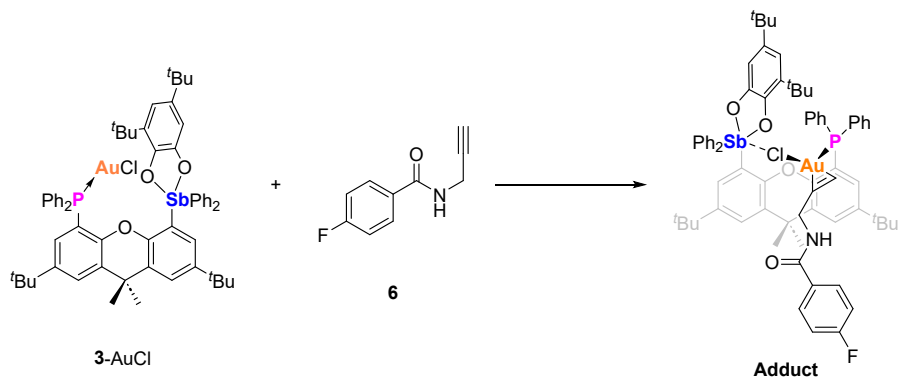

| Compound      | Single point energy | Free energy correction | Free energy  |
|---------------|---------------------|------------------------|--------------|
| <b>3-AuCl</b> | -3767.866721213     | 1.03546675             | -3766.831254 |
| <b>6</b>      | -615.5334972        | 0.11876002             | -615.4147371 |
| <b>Adduct</b> | -4383.3870069911    | 1.18199565             | -4382.205011 |

## References

1. J. S. Nowick, P. Ballester, F. Ebmeyer and J. Rebek, Jr., *Journal of the American Chemical Society*, 1990, **112**, 8902-8906.
2. J. Schulz, J. Antala, D. Rezazgui, I. Císařová and P. Štěpnička, *Inorganic Chemistry*, 2023, **62**, 14028–14043.
3. G. R. Fulmer, A. J. M. Miller, N. H. Sherden, H. E. Gottlieb, A. Nudelman, B. M. Stoltz, J. E. Bercaw and K. I. Goldberg, *Organometallics*, 2010, **29**, 2176-2179.
4. G. M. Sheldrick, *Journal*, 2007.
5. G. M. Sheldrick, *Acta Crystallographica Section A*, 2015, **71**, 3-8.
6. G. M. Sheldrick, *Journal*, 2000.
7. F. Neese, F. Wennmohs, U. Becker and C. Riplinger, *The Journal of Chemical Physics*, 2020, **152**, 224108.
8. S. Grimme, A. Hansen, S. Ehlert and J.-M. Mewes, *The Journal of Chemical Physics*, 2021, **154**, 064103.
9. F. Weigend and R. Ahlrichs, *Physical Chemistry Chemical Physics*, 2005, **7**, 3297-3305.
10. D. Andrae, U. Häußermann, M. Dolg, H. Stoll and H. Preuß, *Theoretica chimica acta*, 1990, **77**, 123-141.
11. B. Metz, H. Stoll and M. Dolg, *The Journal of Chemical Physics*, 2000, **113**, 2563-2569.
12. L. Goerigk and S. Grimme, *Journal of Chemical Theory and Computation*, 2011, **7**, 291-309.
13. B. Metz, H. Stoll and M. Dolg, *Journal of Chemical Physics*, 2000, **113**, 2563-2569.
14. F. Weigend, F. Furche and R. Ahlrichs, *The Journal of Chemical Physics*, 2003, **119**, 12753-12762.
15. T. Lu and F. Chen, *Journal of Computational Chemistry*, 2012, **33**, 580-592.
16. T. Lu and F. Chen, *Journal of Molecular Graphics and Modelling*, 2012, **38**, 314-323.
17. W. Humphrey, A. Dalke and K. Schulten, *Journal of Molecular Graphics*, 1996, **14**, 33-38.
18. J. Zhang and T. Lu, *Physical Chemistry Chemical Physics*, 2021, **23**, 20323-20328.
19. E. Zuidema, P. E. Goudriaan, B. H. G. Swennenhuis, P. C. J. Kamer, P. W. N. M. van Leeuwen, M. Lutz and A. L. Spek, *Organometallics*, 2010, **29**, 1210-1221.
